# Supplementary material
Source: publisher site journal article supplement (https://www.spandidos-publications.com/6152/downloadSupplementary)
Supplement: Supplementary file 1 [file downloadSupplementary]

## Sheet: General
Table SI. General statistics of 8q24. The metrics were obtained with BioMart from Ensemble release 109 and GRCh38.p13.
Gene stable ID	Gene description	Chromosome/scaffold name	Gene start (bp)	Gene end (bp)	Strand	Karyotype band	Gene name	Gene type
ENSG00000147677	eukaryotic translation initiation factor 3 subunit H [Source:HGNC Symbol;Acc:HGNC:3273]	8	116642130	116766925	-1	q24.11	EIF3H	protein_coding
ENSG00000147679	UTP23 small subunit processome component [Source:HGNC Symbol;Acc:HGNC:28224]	8	116766505	116849463	1	q24.11	UTP23	protein_coding
ENSG00000164754	RAD21 cohesin complex component [Source:HGNC Symbol;Acc:HGNC:9811]	8	116845934	116874776	-1	q24.11	RAD21	protein_coding
ENSG00000253327	RAD21 antisense RNA 1 [Source:HGNC Symbol;Acc:HGNC:32158]	8	116874424	116876868	1	q24.11	RAD21-AS1	lncRNA
ENSG00000283956	microRNA 3610 [Source:HGNC Symbol;Acc:HGNC:38942]	8	116874728	116874800	-1	q24.11	MIR3610	miRNA
ENSG00000205002	alanine and arginine rich domain containing protein [Source:HGNC Symbol;Acc:HGNC:33842]	8	116938207	116944487	1	q24.11	AARD	protein_coding
ENSG00000164756	solute carrier family 30 member 8 [Source:HGNC Symbol;Acc:HGNC:20303]	8	116950273	117176714	1	q24.11	SLC30A8	protein_coding
ENSG00000244033	RNA, 7SL, cytoplasmic 228, pseudogene [Source:HGNC Symbol;Acc:HGNC:46244]	8	117017946	117018248	1	q24.11	RN7SL228P	misc_RNA
ENSG00000253271	Nuclear receptor coactivator 3 (NCoA-3) pseudogene	8	117055818	117056145	1	q24.11		processed_pseudogene
ENSG00000253622	novel transcript	8	117128455	117130299	1	q24.11		lncRNA
ENSG00000240151	RNA, 7SL, cytoplasmic 826, pseudogene [Source:HGNC Symbol;Acc:HGNC:46842]	8	117163968	117164255	1	q24.11	RN7SL826P	misc_RNA
ENSG00000286308	novel transcript	8	117265272	117318701	1	q24.11		lncRNA
ENSG00000252852		8	117313528	117313661	1	q24.11		snoRNA
ENSG00000164758	mediator complex subunit 30 [Source:HGNC Symbol;Acc:HGNC:23032]	8	117520713	117540262	1	q24.11	MED30	protein_coding
ENSG00000239917	ribosomal protein S10 pseudogene 16 [Source:HGNC Symbol;Acc:HGNC:36200]	8	117523271	117524061	-1	q24.11	RPS10P16	unprocessed_pseudogene
ENSG00000182197	exostosin glycosyltransferase 1 [Source:HGNC Symbol;Acc:HGNC:3512]	8	117794490	118111826	-1	q24.11	EXT1	protein_coding
ENSG00000177570	sterile alpha motif domain containing 12 [Source:HGNC Symbol;Acc:HGNC:31750]	8	118189455	118622112	-1	q24.12	SAMD12	protein_coding
ENSG00000225885	novel transcript, antisense to SAMD12	8	118282139	118400605	1	q24.11		lncRNA
ENSG00000281641	SAMD12 antisense RNA 1 [Source:HGNC Symbol;Acc:HGNC:30937]	8	118620498	118906155	1	q24.12	SAMD12-AS1	lncRNA
ENSG00000242206	ribosomal protein S26 pseudogene 35 [Source:HGNC Symbol;Acc:HGNC:36229]	8	118761856	118762201	-1	q24.12	RPS26P35	processed_pseudogene
ENSG00000164761	TNF receptor superfamily member 11b [Source:HGNC Symbol;Acc:HGNC:11909]	8	118923557	118951885	-1	q24.12	TNFRSF11B	protein_coding
ENSG00000207334	RNA, U6 small nuclear 12, pseudogene [Source:HGNC Symbol;Acc:HGNC:34256]	8	118976513	118976619	1	q24.12	RNU6-12P	snRNA
ENSG00000254247	GABA(A) receptor-associated protein-like 2 (GABARAPL2) pseudogene	8	118982579	118982875	-1	q24.12		processed_pseudogene
ENSG00000184374	collectin subfamily member 10 [Source:HGNC Symbol;Acc:HGNC:2220]	8	118995452	119108455	1	q24.12	COLEC10	protein_coding
ENSG00000254278	novel transcript	8	119062942	119068782	-1	q24.12		lncRNA
ENSG00000147676	mal, T cell differentiation protein 2 [Source:HGNC Symbol;Acc:HGNC:13634]	8	119165034	119245673	1	q24.12	MAL2	protein_coding
ENSG00000253972	MAL2 antisense RNA 1 [Source:HGNC Symbol;Acc:HGNC:53626]	8	119214625	119246848	-1	q24.12	MAL2-AS1	lncRNA
ENSG00000276479	microRNA 548az [Source:HGNC Symbol;Acc:HGNC:49981]	8	119325171	119325265	1	q24.12	MIR548AZ	miRNA
ENSG00000286282	novel transcript, antisense to NOV	8	119350291	119416947	-1	q24.12		lncRNA
ENSG00000206776		8	119388348	119388469	1	q24.12		snoRNA
ENSG00000136999	cellular communication network factor 3 [Source:HGNC Symbol;Acc:HGNC:7885]	8	119416446	119424434	1	q24.12	CCN3	protein_coding
ENSG00000253398	novel transcript	8	119419910	119462350	-1	q24.12		lncRNA
ENSG00000254037	zinc finger protein 532 (ZNF532) pseudogene	8	119480279	119480775	-1	q24.12		processed_pseudogene
ENSG00000136960	ectonucleotide pyrophosphatase/phosphodiesterase 2 [Source:HGNC Symbol;Acc:HGNC:3357]	8	119557086	119673453	-1	q24.12	ENPP2	protein_coding
ENSG00000253495	CYCS pseudogene 23 [Source:HGNC Symbol;Acc:HGNC:24397]	8	119618162	119618474	-1	q24.12	CYCSP23	processed_pseudogene
ENSG00000201896	RN7SK pseudogene 153 [Source:HGNC Symbol;Acc:HGNC:45877]	8	119711830	119712145	-1	q24.12	RN7SKP153	misc_RNA
ENSG00000064313	TATA-box binding protein associated factor 2 [Source:HGNC Symbol;Acc:HGNC:11536]	8	119730774	119832863	-1	q24.12	TAF2	protein_coding
ENSG00000286362	novel transcript, antisense to DSCC1	8	119832875	119855509	1	q24.12		lncRNA
ENSG00000136982	DNA replication and sister chromatid cohesion 1 [Source:HGNC Symbol;Acc:HGNC:24453]	8	119833976	119855894	-1	q24.12	DSCC1	protein_coding
ENSG00000279347	TEC	8	119838736	119840385	-1	q24.12		TEC
ENSG00000244642	RNA, 7SL, cytoplasmic 396, pseudogene [Source:HGNC Symbol;Acc:HGNC:46412]	8	119862662	119862956	1	q24.12	RN7SL396P	misc_RNA
ENSG00000245330	DEPTOR antisense RNA 1 [Source:HGNC Symbol;Acc:HGNC:55602]	8	119867419	119874488	-1	q24.12	DEPTOR-AS1	lncRNA
ENSG00000155792	DEP domain containing MTOR interacting protein [Source:HGNC Symbol;Acc:HGNC:22953]	8	119873717	120050918	1	q24.12	DEPTOR	protein_coding
ENSG00000202356	RNA, 5S ribosomal pseudogene 277 [Source:HGNC Symbol;Acc:HGNC:43177]	8	119891132	119891229	-1	q24.12	RNA5SP277	rRNA_pseudogene
ENSG00000254343	novel transcript	8	120052180	120056201	1	q24.12		lncRNA
ENSG00000187955	collagen type XIV alpha 1 chain [Source:HGNC Symbol;Acc:HGNC:2191]	8	120059780	120373573	1	q24.12	COL14A1	protein_coding
ENSG00000172172	mitochondrial ribosomal protein L13 [Source:HGNC Symbol;Acc:HGNC:14278]	8	120380761	120445402	-1	q24.12	MRPL13	protein_coding
ENSG00000172167	MDM2 binding protein [Source:HGNC Symbol;Acc:HGNC:7417]	8	120445400	120542133	1	q24.12	MTBP	protein_coding
ENSG00000172164	syntrophin beta 1 [Source:HGNC Symbol;Acc:HGNC:11168]	8	120535745	120813273	-1	q24.12	SNTB1	protein_coding
ENSG00000250290	non-SMC condensin I complex subunit G pseudogene 1 [Source:HGNC Symbol;Acc:HGNC:51904]	8	120635558	120638204	-1	q24.12	NCAPGP1	processed_pseudogene
ENSG00000248318	novel transcript	8	120761253	120776832	1	q24.12		lncRNA
ENSG00000272502	novel transcript	8	120812219	120813359	1	q24.12		lncRNA
ENSG00000253619	novel transcript	8	120913065	121119754	1	q24.12		lncRNA
ENSG00000271219	glucosamine-phosphate N-acetyltransferase 1 (GNPNAT1) pseudogene	8	121113358	121113919	-1	q24.12		processed_pseudogene
ENSG00000239872	ribosomal protein L35a pseudogene 19 [Source:HGNC Symbol;Acc:HGNC:36631]	8	121380137	121380465	-1	q24.12	RPL35AP19	processed_pseudogene
ENSG00000170961	hyaluronan synthase 2 [Source:HGNC Symbol;Acc:HGNC:4819]	8	121612116	121641440	-1	q24.13	HAS2	protein_coding
ENSG00000248690	HAS2 antisense RNA 1 [Source:HGNC Symbol;Acc:HGNC:34340]	8	121639293	121994185	1	q24.13	HAS2-AS1	lncRNA
ENSG00000254209	long intergenic non-protein coding RNA 2855 [Source:HGNC Symbol;Acc:HGNC:54392]	8	121668934	121697600	-1	q24.13	LINC02855	lncRNA
ENSG00000254303	novel transcript	8	121954640	122127184	-1	q24.13		lncRNA
ENSG00000253814	mitochondrial ribosomal protein S36 pseudogene 3 [Source:HGNC Symbol;Acc:HGNC:29773]	8	122091480	122091609	1	q24.13	MRPS36P3	processed_pseudogene
ENSG00000255364	smooth muscle induced lncRNA, enhancer of proliferation [Source:HGNC Symbol;Acc:HGNC:51825]	8	122414332	122428551	-1	q24.13	SMILR	lncRNA
ENSG00000253819	long intergenic non-protein coding RNA 1151 [Source:HGNC Symbol;Acc:HGNC:49471]	8	122485194	122733804	-1	q24.13	LINC01151	lncRNA
ENSG00000255325	novel transcript	8	122485515	122489815	-1	q24.13		lncRNA
ENSG00000238901		8	122671291	122671394	1	q24.13		snoRNA
ENSG00000263443	novel transcript	8	122700269	122703423	-1	q24.13		lncRNA
ENSG00000235165	cyclin dependent kinase 5 pseudogene 1 [Source:HGNC Symbol;Acc:HGNC:21261]	8	122769274	122770150	1	q24.13	CDK5P1	processed_pseudogene
ENSG00000272384	novel transcript	8	122779971	122780830	-1	q24.13		lncRNA
ENSG00000272043	novel transcript	8	122780760	122781071	1	q24.13		lncRNA
ENSG00000178764	zinc fingers and homeoboxes 2 [Source:HGNC Symbol;Acc:HGNC:18513]	8	122781655	122974510	1	q24.13	ZHX2	protein_coding
ENSG00000253372	novel transcript	8	122807746	122816517	1	q24.13		lncRNA
ENSG00000259631	novel transcript	8	122977026	122985629	-1	q24.13		lncRNA
ENSG00000253607	novel transcript, antisense to DERL1	8	123002560	123030751	1	q24.13		lncRNA
ENSG00000136986	derlin 1 [Source:HGNC Symbol;Acc:HGNC:28454]	8	123013170	123042302	-1	q24.13	DERL1	protein_coding
ENSG00000156787	TBC1 domain family member 31 [Source:HGNC Symbol;Acc:HGNC:30888]	8	123041968	123152153	1	q24.13	TBC1D31	protein_coding
ENSG00000253463	high mobility group box 1 pseudogene 19 [Source:HGNC Symbol;Acc:HGNC:39101]	8	123123106	123123682	1	q24.13	HMGB1P19	processed_pseudogene
ENSG00000287657	novel transcript	8	123157729	123165173	1	q24.13		lncRNA
ENSG00000147689	family with sequence similarity 83 member A [Source:HGNC Symbol;Acc:HGNC:28210]	8	123178960	123210079	1	q24.13	FAM83A	protein_coding
ENSG00000221461	Small nucleolar RNA U3 [Source:RFAM;Acc:RF00012]	8	123180310	123180525	-1	q24.13	U3	snoRNA
ENSG00000253258	novel transcript, antisense to FAM83A	8	123181638	123182788	-1	q24.13		lncRNA
ENSG00000253410	WD repeat domain 67 (WDR67) pseudogene	8	123192875	123192932	1	q24.13		transcribed_processed_pseudogene
ENSG00000204949	FAM83A antisense RNA 1 [Source:HGNC Symbol;Acc:HGNC:48658]	8	123193651	123202743	-1	q24.13	FAM83A-AS1	lncRNA
ENSG00000266324	microRNA 4663 [Source:HGNC Symbol;Acc:HGNC:41623]	8	123215788	123215863	-1	q24.13	MIR4663	miRNA
ENSG00000189376	chromosome 8 open reading frame 76 [Source:HGNC Symbol;Acc:HGNC:25924]	8	123219967	123241377	-1	q24.13	C8orf76	protein_coding
ENSG00000259305	ZHX1-C8orf76 readthrough [Source:HGNC Symbol;Acc:HGNC:42975]	8	123226189	123274284	-1	q24.13	ZHX1-C8orf76	protein_coding
ENSG00000243498	ubiquitin A-52 residue ribosomal protein fusion product 1 pseudogene 5 [Source:HGNC Symbol;Acc:HGNC:36993]	8	123236852	123237062	1	q24.13	UBA52P5	processed_pseudogene
ENSG00000165156	zinc fingers and homeoboxes 1 [Source:HGNC Symbol;Acc:HGNC:12871]	8	123248451	123275541	-1	q24.13	ZHX1	protein_coding
ENSG00000222607	RNA, U6 small nuclear 628, pseudogene [Source:HGNC Symbol;Acc:HGNC:47591]	8	123262843	123262949	1	q24.13	RNU6-628P	snRNA
ENSG00000253336	hydroxysteroid (17-beta) dehydrogenase 4 (HSD17B4) pseudogene	8	123288355	123290503	1	q24.13		processed_pseudogene
ENSG00000156802	ATPase family AAA domain containing 2 [Source:HGNC Symbol;Acc:HGNC:30123]	8	123319850	123416350	-1	q24.13	ATAD2	protein_coding
ENSG00000252297	RNA, U6 small nuclear 875, pseudogene [Source:HGNC Symbol;Acc:HGNC:47838]	8	123342414	123342519	1	q24.13	RNU6-875P	snRNA
ENSG00000283172	microRNA 548d-1 [Source:HGNC Symbol;Acc:HGNC:32801]	8	123348034	123348130	-1	q24.13	MIR548D1	miRNA
ENSG00000207704	microRNA 548aa-1 [Source:HGNC Symbol;Acc:HGNC:38944]	8	123348034	123348130	1	q24.13	MIR548AA1	miRNA
ENSG00000254388	deoxyuridine triphosphatase pseudogene 2 [Source:HGNC Symbol;Acc:HGNC:39515]	8	123352181	123352643	1	q24.13	DUTP2	processed_pseudogene
ENSG00000254294	inosine monophosphate dehydrogenase 1 pseudogene 6 [Source:HGNC Symbol;Acc:HGNC:33961]	8	123400582	123402095	1	q24.13	IMPDH1P6	processed_pseudogene
ENSG00000156795	N-terminal glutamine amidase 1 [Source:HGNC Symbol;Acc:HGNC:25490]	8	123416726	123470028	1	q24.13	NTAQ1	protein_coding
ENSG00000278374	U4 spliceosomal RNA [Source:RFAM;Acc:RF00015]	8	123454981	123455107	-1	q24.13	U4	snRNA
ENSG00000156804	F-box protein 32 [Source:HGNC Symbol;Acc:HGNC:16731]	8	123497889	123541206	-1	q24.13	FBXO32	protein_coding
ENSG00000254113	novel transcript	8	123563070	123568762	-1	q24.13		lncRNA
ENSG00000251840	RN7SK pseudogene 155 [Source:HGNC Symbol;Acc:HGNC:45879]	8	123588759	123589046	1	q24.13	RN7SKP155	misc_RNA
ENSG00000253286	novel transcript	8	123614219	123667248	1	q24.13		lncRNA
ENSG00000175946	kelch like family member 38 [Source:HGNC Symbol;Acc:HGNC:34435]	8	123644442	123653801	-1	q24.13	KLHL38	protein_coding
ENSG00000104537	annexin A13 [Source:HGNC Symbol;Acc:HGNC:536]	8	123680794	123737402	-1	q24.13	ANXA13	protein_coding
ENSG00000176853	family with sequence similarity 91 member A1 [Source:HGNC Symbol;Acc:HGNC:26306]	8	123768439	123815452	1	q24.13	FAM91A1	protein_coding
ENSG00000214814	fer-1 like family member 6 [Source:HGNC Symbol;Acc:HGNC:28065]	8	123851987	124120061	1	q24.13	FER1L6	protein_coding
ENSG00000254000	novel transcript	8	123924759	123925933	-1	q24.13		lncRNA
ENSG00000181171	FER1L6 antisense RNA 1 [Source:HGNC Symbol;Acc:HGNC:26652]	8	123984138	124040782	-1	q24.13	FER1L6-AS1	lncRNA
ENSG00000254249	novel transcript	8	124036010	124040468	-1	q24.13		lncRNA
ENSG00000253868	FER1L6 antisense RNA 2 [Source:HGNC Symbol;Acc:HGNC:26534]	8	124044395	124171522	-1	q24.13	FER1L6-AS2	lncRNA
ENSG00000250727	neuropilin (NRP) and tolloid (TLL)-like 2 (NETO2) pseudogene	8	124141888	124143512	1	q24.13		processed_pseudogene
ENSG00000253885	ADP ribosylation factor 1 pseudogene 3 [Source:HGNC Symbol;Acc:HGNC:39884]	8	124151923	124152433	1	q24.13	ARF1P3	processed_pseudogene
ENSG00000214803	novel transcript	8	124192671	124247398	-1	q24.13		lncRNA
ENSG00000206724	RNA, U6 small nuclear 756, pseudogene [Source:HGNC Symbol;Acc:HGNC:47719]	8	124260646	124260752	1	q24.13	RNU6-756P	snRNA
ENSG00000253227	novel transcript	8	124271667	124279580	1	q24.13		lncRNA
ENSG00000237586	SRY (sex determining region Y)-box 2 (SOX2) pseudogene	8	124301315	124301804	1	q24.13		processed_pseudogene
ENSG00000164983	transmembrane protein 65 [Source:HGNC Symbol;Acc:HGNC:25203]	8	124306189	124372701	-1	q24.13	TMEM65	protein_coding
ENSG00000183665	tRNA methyltransferase 12 homolog [Source:HGNC Symbol;Acc:HGNC:26091]	8	124450820	124462150	1	q24.13	TRMT12	protein_coding
ENSG00000245149	RNF139 divergent transcript [Source:HGNC Symbol;Acc:HGNC:48940]	8	124462485	124474582	-1	q24.13	RNF139-DT	lncRNA
ENSG00000170881	ring finger protein 139 [Source:HGNC Symbol;Acc:HGNC:17023]	8	124474880	124488618	1	q24.13	RNF139	protein_coding
ENSG00000147687	TatD DNase domain containing 1 [Source:HGNC Symbol;Acc:HGNC:24220]	8	124488485	124539458	-1	q24.13	TATDN1	protein_coding
ENSG00000253106	novel transcript, antisense to TATDN1	8	124488510	124491643	1	q24.13		lncRNA
ENSG00000284087	microRNA 6844 [Source:HGNC Symbol;Acc:HGNC:50135]	8	124508515	124508576	-1	q24.13	MIR6844	miRNA
ENSG00000147684	NADH:ubiquinone oxidoreductase subunit B9 [Source:HGNC Symbol;Acc:HGNC:7704]	8	124539101	124580648	1	q24.13	NDUFB9	protein_coding
ENSG00000170873	MTSS I-BAR domain containing 1 [Source:HGNC Symbol;Acc:HGNC:20443]	8	124550784	124728473	-1	q24.13	MTSS1	protein_coding
ENSG00000255491	novel transcript	8	124811042	124857516	-1	q24.13		lncRNA
ENSG00000263735	microRNA 4662b [Source:HGNC Symbol;Acc:HGNC:41607]	8	124821978	124822058	-1	q24.13	MIR4662B	miRNA
ENSG00000283609	microRNA 4662a [Source:HGNC Symbol;Acc:HGNC:41826]	8	124821985	124822051	1	q24.13	MIR4662A	miRNA
ENSG00000249816	long intergenic non-protein coding RNA 964 [Source:HGNC Symbol;Acc:HGNC:27226]	8	124823702	124962531	1	q24.13	LINC00964	lncRNA
ENSG00000250428	MRS2 pseudogene 1 [Source:HGNC Symbol;Acc:HGNC:20590]	8	124920428	124922076	1	q24.13	MRS2P1	processed_pseudogene
ENSG00000255313	novel transcript	8	124936328	124943765	-1	q24.13		lncRNA
ENSG00000286955	novel transcript	8	124940041	124941909	-1	q24.13		lncRNA
ENSG00000180938	zinc finger protein 572 [Source:HGNC Symbol;Acc:HGNC:26758]	8	124973295	124979389	1	q24.13	ZNF572	protein_coding
ENSG00000253513	SQLE divergent transcript [Source:HGNC Symbol;Acc:HGNC:55534]	8	124996985	124998198	-1	q24.13	SQLE-DT	lncRNA
ENSG00000104549	squalene epoxidase [Source:HGNC Symbol;Acc:HGNC:11279]	8	124998497	125022283	1	q24.13	SQLE	protein_coding
ENSG00000164961	WASH complex subunit 5 [Source:HGNC Symbol;Acc:HGNC:28984]	8	125024260	125091819	-1	q24.13	WASHC5	protein_coding
ENSG00000253167	WASHC5 antisense RNA 1 [Source:HGNC Symbol;Acc:HGNC:43440]	8	125040684	125044989	1	q24.13	WASHC5-AS1	lncRNA
ENSG00000156831	NSE2 (MMS21) homolog, SMC5-SMC6 complex SUMO ligase [Source:HGNC Symbol;Acc:HGNC:26513]	8	125091679	125367120	1	q24.13	NSMCE2	protein_coding
ENSG00000242170	RNA, 7SL, cytoplasmic 329, pseudogene [Source:HGNC Symbol;Acc:HGNC:46345]	8	125270604	125270902	1	q24.13	RN7SL329P	misc_RNA
ENSG00000254431	novel transcript	8	125348196	125351416	-1	q24.13		lncRNA
ENSG00000173334	tribbles pseudokinase 1 [Source:HGNC Symbol;Acc:HGNC:16891]	8	125430358	125438403	1	q24.13	TRIB1	protein_coding
ENSG00000253111	novel transcript	8	125466939	125541373	1	q24.13		lncRNA
ENSG00000286122	novel transcript	8	125648327	126008930	1	q24.13		lncRNA
ENSG00000253470	novel transcript	8	125749055	125750241	-1	q24.13		lncRNA
ENSG00000245164	long intergenic non-protein coding RNA 861 [Source:HGNC Symbol;Acc:HGNC:45133]	8	125859721	126292788	-1	q24.13	LINC00861	lncRNA
ENSG00000206695	RNA, U6 small nuclear 442, pseudogene [Source:HGNC Symbol;Acc:HGNC:47405]	8	125900951	125901054	1	q24.13	RNU6-442P	snRNA
ENSG00000253651	superoxide dismutase 1 pseudogene 3 [Source:HGNC Symbol;Acc:HGNC:45136]	8	125951861	125952314	-1	q24.13	SOD1P3	processed_pseudogene
ENSG00000254227	novel transcript	8	125998994	126001001	-1	q24.13		lncRNA
ENSG00000250563	lysine rich nucleolar protein 1 pseudogene 5 [Source:HGNC Symbol;Acc:HGNC:48923]	8	126072587	126074231	1	q24.13	KNOP1P5	processed_pseudogene
ENSG00000253841	Transmembrane protein C12orf67 pseudogene	8	126073046	126073532	-1	q24.13		processed_pseudogene
ENSG00000248720	ret finger protein like 4A pseudogene 5 [Source:HGNC Symbol;Acc:HGNC:45144]	8	126174186	126175014	-1	q24.13	RFPL4AP5	processed_pseudogene
ENSG00000244791	novel transcript	8	126325454	126329538	1	q24.21		lncRNA
ENSG00000253427	novel transcript	8	126474189	126492596	1	q24.21		lncRNA
ENSG00000253220	novel transcript	8	126497385	126500440	1	q24.21		lncRNA
ENSG00000207138	RNA, U6 small nuclear 869, pseudogene [Source:HGNC Symbol;Acc:HGNC:47832]	8	126504763	126504869	1	q24.21	RNU6-869P	snRNA
ENSG00000253530	novel transcript	8	126506326	126522360	1	q24.21		lncRNA
ENSG00000168672	LRAT domain containing 2 [Source:HGNC Symbol;Acc:HGNC:24166]	8	126552443	126558478	-1	q24.21	LRATD2	protein_coding
ENSG00000253438	prostate cancer associated transcript 1 [Source:HGNC Symbol;Acc:HGNC:43022]	8	126556323	127419050	1	q24.21	PCAT1	lncRNA
ENSG00000253543	zinc finger protein pseudogene	8	126582631	126583006	-1	q24.21		processed_pseudogene
ENSG00000212451	RNA, U11 small nuclear 4, pseudogene [Source:HGNC Symbol;Acc:HGNC:46944]	8	126671522	126671654	1	q24.21	RNU11-4P	snRNA
ENSG00000253573	novel transcript	8	126766196	126846981	-1	q24.21		lncRNA
ENSG00000254166	cancer susceptibility 19 [Source:HGNC Symbol;Acc:HGNC:49476]	8	127072694	127227541	-1	q24.21	CASC19	lncRNA
ENSG00000282961	prostate cancer associated non-coding RNA 1 [Source:HGNC Symbol;Acc:HGNC:48942]	8	127079874	127092600	1	q24.21	PRNCR1	lncRNA
ENSG00000224722	serine/arginine repetitive matrix 1 (SRRM1) pseudogene	8	127086263	127087510	-1	q24.21		processed_pseudogene
ENSG00000287781	novel transcript	8	127253213	127257630	-1	q24.21		lncRNA
ENSG00000246228	cancer susceptibility 8 [Source:HGNC Symbol;Acc:HGNC:45129]	8	127289808	127482139	-1	q24.21	CASC8	lncRNA
ENSG00000271509	small nuclear ribonucleoprotein polypeptide G (SNRPG) pseudogene	8	127292233	127292440	1	q24.21		processed_pseudogene
ENSG00000212993	POU class 5 homeobox 1B [Source:HGNC Symbol;Acc:HGNC:9223]	8	127322183	127420066	1	q24.21	POU5F1B	protein_coding
ENSG00000280997	colon cancer associated transcript 2 [Source:HGNC Symbol;Acc:HGNC:47044]	8	127400399	127402150	1	q24.21	CCAT2	lncRNA
ENSG00000286266	novel transcript	8	127578473	127636867	1	q24.21		lncRNA
ENSG00000286010	novel transcript	8	127663280	127670990	-1	q24.21		lncRNA
ENSG00000249375	cancer susceptibility 11 [Source:HGNC Symbol;Acc:HGNC:48939]	8	127686343	127738987	-1	q24.21	CASC11	lncRNA
ENSG00000136997	MYC proto-oncogene, bHLH transcription factor [Source:HGNC Symbol;Acc:HGNC:7553]	8	127735434	127742951	1	q24.21	MYC	protein_coding
ENSG00000249859	Pvt1 oncogene [Source:HGNC Symbol;Acc:HGNC:9709]	8	127794526	128187101	1	q24.21	PVT1	lncRNA
ENSG00000283710	microRNA 1204 [Source:HGNC Symbol;Acc:HGNC:37059]	8	127795962	127796028	1	q24.21	MIR1204	miRNA
ENSG00000278324		8	127890626	127890720	1	q24.21		misc_RNA
ENSG00000280055	long intergenic non-protein coding RNA 2912 [Source:HGNC Symbol;Acc:HGNC:32295]	8	127946559	127948723	-1	q24.21	LINC02912	lncRNA
ENSG00000221771	microRNA 1205 [Source:HGNC Symbol;Acc:HGNC:35271]	8	127960633	127960695	1	q24.21	MIR1205	miRNA
ENSG00000207110	RNA, variant U1 small nuclear 32 [Source:HGNC Symbol;Acc:HGNC:48448]	8	127999131	127999294	1	q24.21	RNVU1-32	snRNA
ENSG00000283200	microRNA 1206 [Source:HGNC Symbol;Acc:HGNC:35272]	8	128008898	128008956	1	q24.21	MIR1206	miRNA
ENSG00000278275	protein tyrosine phosphatase type IVA, member 1 (PTP4A1) pseudogene	8	128009551	128011938	-1	q24.21		transcribed_processed_pseudogene
ENSG00000222501	RNA, U4 small nuclear 25, pseudogene [Source:HGNC Symbol;Acc:HGNC:46961]	8	128010382	128010611	-1	q24.21	RNU4-25P	snRNA
ENSG00000221176	microRNA 1207 [Source:HGNC Symbol;Acc:HGNC:35273]	8	128049152	128049238	1	q24.21	MIR1207	miRNA
ENSG00000221261	microRNA 1208 [Source:HGNC Symbol;Acc:HGNC:35274]	8	128150116	128150188	1	q24.21	MIR1208	miRNA
ENSG00000201782	RN7SK pseudogene 226 [Source:HGNC Symbol;Acc:HGNC:45950]	8	128220504	128220803	1	q24.21	RN7SKP226	misc_RNA
ENSG00000286034	novel transcript	8	128323131	128388636	1	q24.21		lncRNA
ENSG00000254275	long intergenic non-protein coding RNA 824 [Source:HGNC Symbol;Acc:HGNC:50281]	8	128405269	128564679	-1	q24.21	LINC00824	lncRNA
ENSG00000229140	CCDC26 long non-coding RNA [Source:HGNC Symbol;Acc:HGNC:28416]	8	128634199	129683770	-1	q24.21	CCDC26	lncRNA
ENSG00000287785	novel transcript	8	129241228	129242469	1	q24.21		lncRNA
ENSG00000253225	minichromosome maintenance complex component 3 associated protein (MCM3AP) pseudogene	8	129250967	129251138	1	q24.21		processed_pseudogene
ENSG00000222755	RN7SK pseudogene 206 [Source:HGNC Symbol;Acc:HGNC:45930]	8	129290983	129291275	1	q24.21	RN7SKP206	misc_RNA
ENSG00000253926	novel transcript	8	129415949	129445852	1	q24.21		lncRNA
ENSG00000263763	microRNA 3686 [Source:HGNC Symbol;Acc:HGNC:38887]	8	129484057	129484142	-1	q24.21	MIR3686	miRNA
ENSG00000285108	novel transcript	8	129685401	129723023	-1	q24.21		lncRNA
ENSG00000224110	mitochondrial translational release factor 1 like pseudogene 2 [Source:HGNC Symbol;Acc:HGNC:50612]	8	129728744	129730445	1	q24.21	MTRF1LP2	processed_pseudogene
ENSG00000147697	gasdermin C [Source:HGNC Symbol;Acc:HGNC:7151]	8	129748196	129786624	-1	q24.21	GSDMC	protein_coding
ENSG00000254317	novel transcript	8	129832301	129844504	1	q24.21		lncRNA
ENSG00000153310	CYFIP related Rac1 interactor B [Source:HGNC Symbol;Acc:HGNC:25216]	8	129839593	130017129	-1	q24.21	CYRIB	protein_coding
ENSG00000243402	ribosomal protein L15 (RPL15) pseudogene	8	129864478	129865052	1	q24.21		processed_pseudogene
ENSG00000200075		8	129868590	129868716	-1	q24.21		snoRNA
ENSG00000254263	novel transcript	8	129890465	129901758	1	q24.21		lncRNA
ENSG00000253720	novel transcript	8	129939844	129951056	1	q24.21		lncRNA
ENSG00000287195	novel transcript, antisense to FAM49B	8	129953729	129964634	1	q24.21		lncRNA
ENSG00000253043	RNA, U7 small nuclear 181 pseudogene [Source:HGNC Symbol;Acc:HGNC:45715]	8	130004528	130004601	-1	q24.21	RNU7-181P	snRNA
ENSG00000264653	microRNA 5194 [Source:HGNC Symbol;Acc:HGNC:43498]	8	130008334	130008453	-1	q24.21	MIR5194	miRNA
ENSG00000153317	ArfGAP with SH3 domain, ankyrin repeat and PH domain 1 [Source:HGNC Symbol;Acc:HGNC:2720]	8	130052104	130443674	-1	q24.22	ASAP1	protein_coding
ENSG00000200304	RNA, U6 small nuclear 1255, pseudogene [Source:HGNC Symbol;Acc:HGNC:48218]	8	130069541	130069652	-1	q24.21	RNU6-1255P	snRNA
ENSG00000280543	ASAP1 intronic transcript 2 [Source:HGNC Symbol;Acc:HGNC:48917]	8	130082738	130084768	-1	q24.21	ASAP1-IT2	lncRNA
ENSG00000212342		8	130162972	130163127	1	q24.21		snoRNA
ENSG00000287201	novel transcript, antisense to ASAP1	8	130248287	130251051	1	q24.21		lncRNA
ENSG00000286535	novel transcript, antisense to ASAP1	8	130358787	130362461	1	q24.21		lncRNA
ENSG00000253656	novel transcript	8	130595299	130655712	-1	q24.22		lncRNA
ENSG00000155897	adenylate cyclase 8 [Source:HGNC Symbol;Acc:HGNC:239]	8	130780301	131040909	-1	q24.22	ADCY8	protein_coding
ENSG00000253259	novel transcript	8	130892070	130892785	-1	q24.22		lncRNA
ENSG00000253992	novel transcript	8	130935409	130949665	1	q24.22		lncRNA
ENSG00000253407	novel transcript	8	131129761	131144948	-1	q24.22		lncRNA
ENSG00000253507	novel transcript	8	131308545	131317887	1	q24.22		lncRNA
ENSG00000252158	Small nucleolar RNA SNORA72 [Source:RFAM;Acc:RF00139]	8	131432776	131432869	-1	q24.22	SNORA72	snoRNA
ENSG00000254255	RNA binding motif protein 45 (RBM45) pseudogene	8	131712512	131712980	1	q24.22		processed_pseudogene
ENSG00000132294	EFR3 homolog A [Source:HGNC Symbol;Acc:HGNC:28970]	8	131904093	132013642	1	q24.22	EFR3A	protein_coding
ENSG00000253117	otoconin 90 [Source:HGNC Symbol;Acc:HGNC:8100]	8	132024216	132059382	-1	q24.22	OC90	protein_coding
ENSG00000258417	novel protein	8	132024238	132085655	-1	q24.22		protein_coding
ENSG00000132297	HERV-H LTR-associating 1 [Source:HGNC Symbol;Acc:HGNC:4904]	8	132061480	132111159	-1	q24.22	HHLA1	protein_coding
ENSG00000184156	potassium voltage-gated channel subfamily Q member 3 [Source:HGNC Symbol;Acc:HGNC:6297]	8	132120859	132481095	-1	q24.22	KCNQ3	protein_coding
ENSG00000253521	Helicobacter pylori responsive 1 [Source:HGNC Symbol;Acc:HGNC:16071]	8	132507962	132565246	-1	q24.22	HPYR1	lncRNA
ENSG00000129295	dynein axonemal assembly factor 11 [Source:HGNC Symbol;Acc:HGNC:16725]	8	132570416	132675592	-1	q24.22	DNAAF11	protein_coding
ENSG00000165071	transmembrane protein 71 [Source:HGNC Symbol;Acc:HGNC:26572]	8	132685007	132760712	-1	q24.22	TMEM71	protein_coding
ENSG00000287095	novel transcript, antisense to TMEM71	8	132702812	132722283	1	q24.22		lncRNA
ENSG00000129292	PHD finger protein 20 like 1 [Source:HGNC Symbol;Acc:HGNC:24280]	8	132775358	132848807	1	q24.22	PHF20L1	protein_coding
ENSG00000270137	novel transcript, intronic to PHF20L1	8	132826179	132826903	1	q24.22		lncRNA
ENSG00000223697	novel transcript, antisense to PHF20L1	8	132838117	132844298	-1	q24.22		lncRNA
ENSG00000042832	thyroglobulin [Source:HGNC Symbol;Acc:HGNC:11764]	8	132866958	133134903	1	q24.22	TG	protein_coding
ENSG00000240237	ribosomal protein L21 (RPL21) pseudogene	8	133002605	133003075	-1	q24.22		processed_pseudogene
ENSG00000155926	Src like adaptor [Source:HGNC Symbol;Acc:HGNC:10902]	8	133036728	133102912	-1	q24.22	SLA	protein_coding
ENSG00000276961	microRNA 7848 [Source:HGNC Symbol;Acc:HGNC:50058]	8	133046481	133046581	-1	q24.22	MIR7848	miRNA
ENSG00000287736	papillary thyroid carcinoma susceptibility candidate 1 [Source:NCBI gene (formerly Entrezgene);Acc:100302522]	8	133054959	133057767	1	q24.22	PTCSC1	lncRNA
ENSG00000104415	cellular communication network factor 4 [Source:HGNC Symbol;Acc:HGNC:12769]	8	133191039	133231690	1	q24.22	CCN4	protein_coding
ENSG00000289316	novel transcript	8	133237171	133237927	-1	q24.22		lncRNA
ENSG00000104419	N-myc downstream regulated 1 [Source:HGNC Symbol;Acc:HGNC:7679]	8	133237175	133302022	-1	q24.22	NDRG1	protein_coding
ENSG00000243537	ribosomal protein L32 pseudogene 20 [Source:HGNC Symbol;Acc:HGNC:35934]	8	133325997	133326404	1	q24.22	RPL32P20	processed_pseudogene
ENSG00000253638	developmental pluripotency associated 3 pseudogene	8	133392211	133392690	-1	q24.22		processed_pseudogene
ENSG00000225259	ST13, Hsp70 interacting protein pseudogene 6 [Source:HGNC Symbol;Acc:HGNC:18557]	8	133408006	133409107	1	q24.22	ST13P6	processed_pseudogene
ENSG00000008513	ST3 beta-galactoside alpha-2,3-sialyltransferase 1 [Source:HGNC Symbol;Acc:HGNC:10862]	8	133454848	133571940	-1	q24.22	ST3GAL1	protein_coding
ENSG00000283176	mitochondrially encoded NADH dehydrogenase 3 (MT-ND3) pseudogene	8	133515506	133515745	1	q24.22		processed_pseudogene
ENSG00000283197	mitochondrially encoded NADH 4L dehydrogenase (MT-ND4L) pseudogene	8	133516184	133516268	1	q24.22		processed_pseudogene
ENSG00000289050	novel transcript, sense intronic to ST3GAL1	8	133570876	133571619	-1	q24.22		lncRNA
ENSG00000261220	ST3GAL1 divergent transcript [Source:HGNC Symbol;Acc:HGNC:55372]	8	133573183	133573861	1	q24.22	ST3GAL1-DT	lncRNA
ENSG00000212273		8	133644598	133644725	-1	q24.22		snoRNA
ENSG00000276193	Metazoan signal recognition particle RNA [Source:RFAM;Acc:RF00017]	8	133668420	133668701	-1	q24.22	Metazoa_SRP	misc_RNA
ENSG00000253970	MT-ND2 pseudogene 7 [Source:HGNC Symbol;Acc:HGNC:42141]	8	133754811	133755450	1	q24.22	MTND2P7	processed_pseudogene
ENSG00000253916	MT-CO1 pseudogene 49 [Source:HGNC Symbol;Acc:HGNC:52114]	8	133755845	133756646	1	q24.22	MTCO1P49	processed_pseudogene
ENSG00000253561	novel transcript	8	133771409	133814537	1	q24.22		lncRNA
ENSG00000253165	novel transcript	8	133775551	133777352	-1	q24.22		lncRNA
ENSG00000254313	non-metastatic cells 2, protein (NM23B) expressed in pseudogene	8	133786093	133786268	-1	q24.22		processed_pseudogene
ENSG00000253593	novel transcript	8	133886496	133902407	1	q24.22		lncRNA
ENSG00000277576	CTAGE family, member 5 (CTAGE5) pseudogene	8	133946677	133947335	1	q24.22		unprocessed_pseudogene
ENSG00000271240	NIMA-related kinase 4 (NEK4) pseudogene	8	133962992	133963259	-1	q24.22		processed_pseudogene
ENSG00000288067	novel transcript	8	134190383	134390487	-1	q24.22		lncRNA
ENSG00000253627	novel transcript	8	134211865	134320447	-1	q24.22		lncRNA
ENSG00000066827	zinc finger and AT-hook domain containing [Source:HGNC Symbol;Acc:HGNC:19899]	8	134477788	134713049	-1	q24.22	ZFAT	protein_coding
ENSG00000276140		8	134598071	134598149	1	q24.22		misc_RNA
ENSG00000248492	ZFAT antisense RNA 1 [Source:HGNC Symbol;Acc:HGNC:33992]	8	134598071	134600689	1	q24.22	ZFAT-AS1	lncRNA
ENSG00000277732		8	134598318	134598518	1	q24.22		misc_RNA
ENSG00000278454		8	134600257	134600336	1	q24.22		misc_RNA
ENSG00000271048	developmental pluripotency associated 3 (DPPA3) pseudogene	8	134673131	134673512	1	q24.22		processed_pseudogene
ENSG00000289405	novel transcript	8	134715820	134799296	-1	q24.22		lncRNA
ENSG00000272456	novel transcript	8	134722947	134723949	1	q24.22		lncRNA
ENSG00000278898	TEC	8	134764809	134767276	1	q24.22		TEC
ENSG00000279518	TEC	8	134783694	134785879	-1	q24.22		TEC
ENSG00000259820	novel transcript	8	134792020	134798272	-1	q24.22		lncRNA
ENSG00000207582	microRNA 30b [Source:HGNC Symbol;Acc:HGNC:31625]	8	134800520	134800607	-1	q24.22	MIR30B	miRNA
ENSG00000199153	microRNA 30d [Source:HGNC Symbol;Acc:HGNC:31628]	8	134804876	134804945	-1	q24.22	MIR30D	miRNA
ENSG00000254028	novel transcript	8	134832747	134834482	1	q24.22		lncRNA
ENSG00000253433	novel transcript	8	134838069	134842637	1	q24.22		lncRNA
ENSG00000251218	novel transcript	8	134849935	134881899	1	q24.22		lncRNA
ENSG00000244413	ribosomal protein L23a pseudogene 56 [Source:HGNC Symbol;Acc:HGNC:35516]	8	134978827	134979279	-1	q24.22	RPL23AP56	processed_pseudogene
ENSG00000254083	long intergenic non-protein coding RNA 1591 [Source:HGNC Symbol;Acc:HGNC:27819]	8	135234131	135299719	1	q24.22	LINC01591	lncRNA
ENSG00000254372	novel transcript	8	135455865	135456952	-1	q24.23		lncRNA
ENSG00000131773	KH RNA binding domain containing, signal transduction associated 3 [Source:HGNC Symbol;Acc:HGNC:18117]	8	135457456	135656722	1	q24.23	KHDRBS3	protein_coding
ENSG00000253915	MAPRE1 pseudogene 1 [Source:HGNC Symbol;Acc:HGNC:29624]	8	135625185	135625981	-1	q24.23	MAPRE1P1	processed_pseudogene
ENSG00000199652	RNA, U1 small nuclear 35, pseudogene [Source:HGNC Symbol;Acc:HGNC:48377]	8	135742343	135742495	-1	q24.23	RNU1-35P	snRNA
ENSG00000254101	long intergenic non-protein coding RNA 2055 [Source:HGNC Symbol;Acc:HGNC:52895]	8	135859369	137092183	1	q24.23	LINC02055	lncRNA
ENSG00000286927	novel transcript	8	135977329	135980588	-1	q24.23		lncRNA
ENSG00000285683	Novel transcript	8	136237236	136295232	-1	q24.23		lncRNA
ENSG00000206678	RNA, U6 small nuclear 144, pseudogene [Source:HGNC Symbol;Acc:HGNC:47107]	8	137105352	137105458	1	q24.23	RNU6-144P	snRNA
ENSG00000274572	zyxin pseudogene 1 [Source:HGNC Symbol;Acc:HGNC:51695]	8	137424904	137425021	-1	q24.23	ZYXP1	unprocessed_pseudogene
ENSG00000285817	Novel transcript	8	137524755	137645564	-1	q24.23		lncRNA
ENSG00000254076	nucleolar and coiled-body phosphoprotein 1 (NOLC1) pseudogene	8	137696724	137698467	1	q24.23		processed_pseudogene
ENSG00000253288	novel transcript	8	137809444	138083657	-1	q24.23		lncRNA
ENSG00000254361	novel transcript	8	137852204	138019873	1	q24.23		lncRNA
ENSG00000253988	novel transcript	8	138063268	138073240	1	q24.23		lncRNA
ENSG00000147724	family with sequence similarity 135 member B [Source:HGNC Symbol;Acc:HGNC:28029]	8	138130023	138497261	-1	q24.23	FAM135B	protein_coding
ENSG00000169436	collagen type XXII alpha 1 chain [Source:HGNC Symbol;Acc:HGNC:22989]	8	138588235	138914041	-1	q24.3	COL22A1	protein_coding
ENSG00000253432	novel transcript	8	139096305	139102830	-1	q24.3		lncRNA
ENSG00000251744		8	139108430	139108534	1	q24.3		snoRNA
ENSG00000253783	novel transcript	8	139114193	139127953	-1	q24.3		lncRNA
ENSG00000254258	novel transcript	8	139460062	139463016	-1	q24.3		lncRNA
ENSG00000275078	MAD1 mitotic arrest deficient-like 1 (yeast) (MAD1L1) pseudogene	8	139508701	139508971	-1	q24.3		unprocessed_pseudogene
ENSG00000169427	potassium two pore domain channel subfamily K member 9 [Source:HGNC Symbol;Acc:HGNC:6283]	8	139600838	139704109	-1	q24.3	KCNK9	protein_coding
ENSG00000167632	trafficking protein particle complex subunit 9 [Source:HGNC Symbol;Acc:HGNC:30832]	8	139727725	140458579	-1	q24.3	TRAPPC9	protein_coding
ENSG00000253574	novel transcript	8	139911238	139916620	1	q24.3		lncRNA
ENSG00000250733	chromosome 8 putative open reading frame 17 [Source:HGNC Symbol;Acc:HGNC:17737]	8	139931172	139933942	1	q24.3	C8orf17	TEC
ENSG00000274064	glyceraldehyde-3-phosphate dehydrogenase (GAPDH) pseudogene	8	140039756	140041037	1	q24.3		processed_pseudogene
ENSG00000282164	paternally expressed 13 [Source:HGNC Symbol;Acc:HGNC:19969]	8	140094894	140100543	-1	q24.3	PEG13	lncRNA
ENSG00000259891	novel transcript, antisense to CHRAC1	8	140505813	140508043	-1	q24.3		lncRNA
ENSG00000104472	chromatin accessibility complex subunit 1 [Source:HGNC Symbol;Acc:HGNC:13544]	8	140511311	140517154	1	q24.3	CHRAC1	protein_coding
ENSG00000123908	argonaute RISC catalytic component 2 [Source:HGNC Symbol;Acc:HGNC:3263]	8	140520156	140635633	-1	q24.3	AGO2	protein_coding
ENSG00000279766	TEC	8	140572142	140572812	-1	q24.3		TEC
ENSG00000280326	TEC	8	140591684	140593201	1	q24.3		TEC
ENSG00000280303	E2F1-regulated inhibitor of cell death [Source:HGNC Symbol;Acc:HGNC:49404]	8	140636281	140638283	1	q24.3	ERICD	lncRNA
ENSG00000169398	protein tyrosine kinase 2 [Source:HGNC Symbol;Acc:HGNC:9611]	8	140657900	141002216	-1	q24.3	PTK2	protein_coding
ENSG00000254324	microRNA 151a [Source:HGNC Symbol;Acc:HGNC:31762]	8	140732564	140732653	-1	q24.3	MIR151A	miRNA
ENSG00000279786	TEC	8	140820599	140822414	-1	q24.3		TEC
ENSG00000252864	RNA, 5S ribosomal pseudogene 278 [Source:HGNC Symbol;Acc:HGNC:43178]	8	140940562	140940663	1	q24.3	RNA5SP278	rRNA_pseudogene
ENSG00000253266	novel transcript	8	141055290	141060596	1	q24.3		lncRNA
ENSG00000105339	DENN domain containing 3 [Source:HGNC Symbol;Acc:HGNC:29134]	8	141117278	141195808	1	q24.3	DENND3	protein_coding
ENSG00000253210	DENND3 antisense RNA 1 [Source:HGNC Symbol;Acc:HGNC:55537]	8	141124717	141130070	-1	q24.3	DENND3-AS1	lncRNA
ENSG00000022567	solute carrier family 45 member 4 [Source:HGNC Symbol;Acc:HGNC:29196]	8	141207166	141308305	-1	q24.3	SLC45A4	protein_coding
ENSG00000280035	TEC	8	141224288	141226947	-1	q24.3		TEC
ENSG00000253307	novel transcript	8	141252286	141253292	-1	q24.3		lncRNA
ENSG00000254019	novel transcript, antisense to SLC45A4	8	141254565	141256817	1	q24.3		lncRNA
ENSG00000254197	novel transcript	8	141278228	141292862	1	q24.3		lncRNA
ENSG00000254291	novel transcript	8	141326130	141327137	1	q24.3		lncRNA
ENSG00000253595	long intergenic non-protein coding RNA 1300 [Source:HGNC Symbol;Acc:HGNC:50460]	8	141340505	141344621	1	q24.3	LINC01300	lncRNA
ENSG00000261655	novel transcript, overlapping to GPR20	8	141353403	141355365	-1	q24.3		lncRNA
ENSG00000204882	G protein-coupled receptor 20 [Source:HGNC Symbol;Acc:HGNC:4475]	8	141356470	141367286	-1	q24.3	GPR20	protein_coding
ENSG00000289263	novel transcript	8	141374203	141382229	1	q24.3		lncRNA
ENSG00000244998	novel transcript, antisense to PTP4A3	8	141389939	141392574	-1	q24.3		lncRNA
ENSG00000184489	protein tyrosine phosphatase 4A3 [Source:HGNC Symbol;Acc:HGNC:9636]	8	141391995	141432454	1	q24.3	PTP4A3	protein_coding
ENSG00000226807	maestro heat like repeat family member 5 (gene/pseudogene) [Source:HGNC Symbol;Acc:HGNC:42976]	8	141433829	141507230	-1	q24.3	MROH5	polymorphic_pseudogene
ENSG00000271959	novel transcript, antisense to MROH5	8	141434545	141437954	1	q24.3		lncRNA
ENSG00000238854		8	141447475	141447549	1	q24.3		snoRNA
ENSG00000253605	heterogeneous nuclear ribonucleoprotein A1pseudogene 38 [Source:HGNC Symbol;Acc:HGNC:48767]	8	141459075	141460031	1	q24.3	HNRNPA1P38	processed_pseudogene
ENSG00000287325	novel transcript	8	141507333	141509785	1	q24.3		lncRNA
ENSG00000226490	novel protein	8	141514638	141518737	1	q24.3		protein_coding
ENSG00000287677	novel transcript	8	141581658	141662209	1	q24.3		lncRNA
ENSG00000221768	microRNA 1302-7 [Source:HGNC Symbol;Acc:HGNC:35299]	8	141786242	141786313	-1	q24.3	MIR1302-7	miRNA
ENSG00000254183	DnaJ (Hsp40) homolog, subfamily C, member 8 (DNAJC8) pseudogene	8	141968091	141968841	-1	q24.3		processed_pseudogene
ENSG00000261710	novel transcript	8	142089827	142091619	1	q24.3		lncRNA
ENSG00000287332	novel transcript	8	142111414	142185527	-1	q24.3		lncRNA
ENSG00000265247	microRNA 4472-1 [Source:HGNC Symbol;Acc:HGNC:41644]	8	142176339	142176418	1	q24.3	MIR4472-1	miRNA
ENSG00000289338	novel transcript	8	142189982	142194778	1	q24.3		lncRNA
ENSG00000254008	long intergenic non-protein coding RNA 51 [Source:HGNC Symbol;Acc:HGNC:32028]	8	142198356	142209003	1	q24.3	LINC00051	lncRNA
ENSG00000171045	t-SNARE domain containing 1 [Source:HGNC Symbol;Acc:HGNC:26437]	8	142212080	142403182	-1	q24.3	TSNARE1	protein_coding
ENSG00000253602	RNA, 7SL, cytoplasmic 260, pseudogene [Source:HGNC Symbol;Acc:HGNC:46276]	8	142247585	142247866	-1	q24.3	RN7SL260P	misc_RNA
ENSG00000261693	novel transcript, antisense to TSNARE1	8	142403652	142407028	1	q24.3		lncRNA
ENSG00000181790	adhesion G protein-coupled receptor B1 [Source:HGNC Symbol;Acc:HGNC:943]	8	142449430	142545009	1	q24.3	ADGRB1	protein_coding
ENSG00000232722	maestro heat like repeat family member 4, pseudogene [Source:HGNC Symbol;Acc:HGNC:44902]	8	142567260	142577881	-1	q24.3	MROH4P	transcribed_unitary_pseudogene
ENSG00000289477	novel transcript	8	142579023	142580927	1	q24.3		lncRNA
ENSG00000198576	activity regulated cytoskeleton associated protein [Source:HGNC Symbol;Acc:HGNC:648]	8	142611049	142614479	-1	q24.3	ARC	protein_coding
ENSG00000289411	novel transcript	8	142615644	142616205	1	q24.3		lncRNA
ENSG00000277332	novel transcript	8	142616293	142640648	1	q24.3		lncRNA
ENSG00000261044	novel transcript, antisense to ARC	8	142620373	142621064	1	q24.3		lncRNA
ENSG00000234616	Jrk helix-turn-helix protein [Source:HGNC Symbol;Acc:HGNC:6199]	8	142657460	142681968	-1	q24.3	JRK	protein_coding
ENSG00000167653	prostate stem cell antigen [Source:HGNC Symbol;Acc:HGNC:9500]	8	142670308	142682725	1	q24.3	PSCA	protein_coding
ENSG00000160886	lymphocyte antigen 6 family member K [Source:HGNC Symbol;Acc:HGNC:24225]	8	142700111	142705127	1	q24.3	LY6K	protein_coding
ENSG00000253741	lncRNA associated with ovarian cancer 1 [Source:HGNC Symbol;Acc:HGNC:53947]	8	142701857	142727047	-1	q24.3	LNCOC1	lncRNA
ENSG00000130193	thioesterase superfamily member 6 [Source:HGNC Symbol;Acc:HGNC:29656]	8	142727223	142736927	1	q24.3	THEM6	protein_coding
ENSG00000253806	novel transcript	8	142727283	142727690	-1	q24.3		lncRNA
ENSG00000126233	secreted LY6/PLAUR domain containing 1 [Source:HGNC Symbol;Acc:HGNC:18746]	8	142740949	142742406	-1	q24.3	SLURP1	protein_coding
ENSG00000197353	LY6/PLAUR domain containing 2 [Source:HGNC Symbol;Acc:HGNC:25215]	8	142750150	142752532	-1	q24.3	LYPD2	protein_coding
ENSG00000253196	novel transcript	8	142763040	142766430	1	q24.3		lncRNA
ENSG00000284505	LYNX1-SLURP2 readthrough [Source:HGNC Symbol;Acc:HGNC:52291]	8	142764334	142778224	-1	q24.3	LYNX1-SLURP2	protein_coding
ENSG00000283992	secreted LY6/PLAUR domain containing 2 [Source:HGNC Symbol;Acc:HGNC:25549]	8	142764338	142769828	-1	q24.3	SLURP2	protein_coding
ENSG00000180155	Ly6/neurotoxin 1 [Source:HGNC Symbol;Acc:HGNC:29604]	8	142771197	142777810	-1	q24.3	LYNX1	protein_coding
ENSG00000167656	lymphocyte antigen 6 family member D [Source:HGNC Symbol;Acc:HGNC:13348]	8	142784882	142786539	-1	q24.3	LY6D	protein_coding
ENSG00000253715	novel transcript	8	142785374	142812120	1	q24.3		lncRNA
ENSG00000283686	lymphocyte antigen 6 complex, locus K (LY6K) pseudogene	8	142797624	142806142	-1	q24.3		unprocessed_pseudogene
ENSG00000253728	novel transcript	8	142834138	142834940	-1	q24.3		lncRNA
ENSG00000104499	glycosylphosphatidylinositol anchored molecule like [Source:HGNC Symbol;Acc:HGNC:4375]	8	142834247	142916506	1	q24.3	GML	protein_coding
ENSG00000253421	zinc finger HIT-type containing 1 pseudogene 1 [Source:HGNC Symbol;Acc:HGNC:44474]	8	142858354	142858797	1	q24.3	ZNHIT1P1	processed_pseudogene
ENSG00000160882	cytochrome P450 family 11 subfamily B member 1 [Source:HGNC Symbol;Acc:HGNC:2591]	8	142872356	142879846	-1	q24.3	CYP11B1	protein_coding
ENSG00000179142	cytochrome P450 family 11 subfamily B member 2 [Source:HGNC Symbol;Acc:HGNC:2592]	8	142910559	142917843	-1	q24.3	CYP11B2	protein_coding
ENSG00000247317	LY6E divergent transcript [Source:HGNC Symbol;Acc:HGNC:53728]	8	142981738	143018437	-1	q24.3	LY6E-DT	lncRNA
ENSG00000253971	cell division cycle 42 pseudogene 3 [Source:HGNC Symbol;Acc:HGNC:44427]	8	142995850	142996482	1	q24.3	CDC42P3	processed_pseudogene
ENSG00000160932	lymphocyte antigen 6 family member E [Source:HGNC Symbol;Acc:HGNC:6727]	8	143017982	143023832	1	q24.3	LY6E	protein_coding
ENSG00000177335	long intergenic non-protein coding RNA 2904 [Source:HGNC Symbol;Acc:HGNC:26731]	8	143039209	143060684	1	q24.3	LINC02904	lncRNA
ENSG00000250115	adenylate kinase 3 pseudogene 2 [Source:HGNC Symbol;Acc:HGNC:31099]	8	143057060	143057816	-1	q24.3	AK3P2	processed_pseudogene
ENSG00000243328	ribosomal protein S26 (RPS26) pseudogene	8	143065915	143066587	-1	q24.3		processed_pseudogene
ENSG00000261667	lymphocyte antigen 6 family member L [Source:HGNC Symbol;Acc:HGNC:52284]	8	143080630	143083486	1	q24.3	LY6L	protein_coding
ENSG00000176956	lymphocyte antigen 6 family member H [Source:HGNC Symbol;Acc:HGNC:6728]	8	143157914	143160711	-1	q24.3	LY6H	protein_coding
ENSG00000277494	glycosylphosphatidylinositol anchored high density lipoprotein binding protein 1 [Source:HGNC Symbol;Acc:HGNC:24945]	8	143213218	143217170	1	q24.3	GPIHBP1	protein_coding
ENSG00000181638	ZFP41 zinc finger protein [Source:HGNC Symbol;Acc:HGNC:26786]	8	143246821	143262705	1	q24.3	ZFP41	protein_coding
ENSG00000264668	novel protein	8	143247110	143276403	1	q24.3		protein_coding
ENSG00000250571	GLI family zinc finger 4 [Source:HGNC Symbol;Acc:HGNC:4320]	8	143267433	143276931	1	q24.3	GLI4	protein_coding
ENSG00000253716	MYC-induced long non-coding RNA [Source:HGNC Symbol;Acc:HGNC:51653]	8	143280158	143281692	-1	q24.3	MINCR	lncRNA
ENSG00000185730	zinc finger protein 696 [Source:HGNC Symbol;Acc:HGNC:25872]	8	143289676	143299952	1	q24.3	ZNF696	protein_coding
ENSG00000272172	novel transcript, antisense to ZNF696	8	143290399	143290621	-1	q24.3		lncRNA
ENSG00000184428	DNA topoisomerase I mitochondrial [Source:HGNC Symbol;Acc:HGNC:29787]	8	143304384	143359979	-1	q24.3	TOP1MT	protein_coding
ENSG00000212221	RNA, U6 small nuclear 220, pseudogene [Source:HGNC Symbol;Acc:HGNC:47183]	8	143350172	143350278	1	q24.3	RNU6-220P	snRNA
ENSG00000254389	RHPN1 antisense RNA 1 (head to head) [Source:HGNC Symbol;Acc:HGNC:28457]	8	143366631	143368548	-1	q24.3	RHPN1-AS1	lncRNA
ENSG00000158106	rhophilin Rho GTPase binding protein 1 [Source:HGNC Symbol;Acc:HGNC:19973]	8	143368876	143384221	1	q24.3	RHPN1	protein_coding
ENSG00000253931	novel transcript	8	143412749	143417054	1	q24.3		lncRNA
ENSG00000254338	MAFA antisense RNA 1 [Source:HGNC Symbol;Acc:HGNC:51203]	8	143417679	143419150	1	q24.3	MAFA-AS1	lncRNA
ENSG00000182759	MAF bZIP transcription factor A [Source:HGNC Symbol;Acc:HGNC:23145]	8	143419182	143430732	-1	q24.3	MAFA	protein_coding
ENSG00000014164	zinc finger CCCH-type containing 3 [Source:HGNC Symbol;Acc:HGNC:28972]	8	143437659	143541447	-1	q24.3	ZC3H3	protein_coding
ENSG00000287576	novel transcript	8	143541648	143545128	1	q24.3		lncRNA
ENSG00000254859	novel transcript	8	143541973	143549729	-1	q24.3		lncRNA
ENSG00000275558	RN7SK pseudogene 175 [Source:HGNC Symbol;Acc:HGNC:45899]	8	143542110	143542398	1	q24.3	RN7SKP175	misc_RNA
ENSG00000104518	gasdermin D [Source:HGNC Symbol;Acc:HGNC:25697]	8	143553207	143563062	1	q24.3	GSDMD	protein_coding
ENSG00000289161	novel transcript, antisense to GSDMD	8	143556821	143558277	-1	q24.3		lncRNA
ENSG00000204839	maestro heat like repeat family member 6 [Source:HGNC Symbol;Acc:HGNC:27814]	8	143566192	143572772	-1	q24.3	MROH6	protein_coding
ENSG00000255050	novel transcript	8	143573490	143577397	1	q24.3		lncRNA
ENSG00000147813	nicotinate phosphoribosyltransferase [Source:HGNC Symbol;Acc:HGNC:30450]	8	143574785	143578649	-1	q24.3	NAPRT	protein_coding
ENSG00000279605	TEC	8	143578358	143583304	1	q24.3		TEC
ENSG00000254741	novel transcript	8	143579636	143580670	1	q24.3		lncRNA
ENSG00000104529	eukaryotic translation elongation factor 1 delta [Source:HGNC Symbol;Acc:HGNC:3211]	8	143579697	143599541	-1	q24.3	EEF1D	protein_coding
ENSG00000179886	tigger transposable element derived 5 [Source:HGNC Symbol;Acc:HGNC:18336]	8	143597831	143603224	1	q24.3	TIGD5	protein_coding
ENSG00000104524	pyrroline-5-carboxylate reductase 3 [Source:HGNC Symbol;Acc:HGNC:25846]	8	143603210	143609773	-1	q24.3	PYCR3	protein_coding
ENSG00000104522	GDP-L-fucose synthase [Source:HGNC Symbol;Acc:HGNC:12390]	8	143612618	143618048	-1	q24.3	GFUS	protein_coding
ENSG00000254812	novel transcript	8	143620586	143633756	-1	q24.3		lncRNA
ENSG00000183309	zinc finger protein 623 [Source:HGNC Symbol;Acc:HGNC:29084]	8	143636019	143656418	1	q24.3	ZNF623	protein_coding
ENSG00000181135	zinc finger protein 707 [Source:HGNC Symbol;Acc:HGNC:27815]	8	143684452	143713898	1	q24.3	ZNF707	protein_coding
ENSG00000181097	long intergenic non-protein coding RNA 2878 [Source:HGNC Symbol;Acc:HGNC:54524]	8	143696154	143698413	1	q24.3	LINC02878	lncRNA
ENSG00000255181	coiled-coil domain containing 166 [Source:HGNC Symbol;Acc:HGNC:41910]	8	143706694	143708109	-1	q24.3	CCDC166	protein_coding
ENSG00000254574	novel transcript	8	143709007	143713584	-1	q24.3		lncRNA
ENSG00000181085	mitogen-activated protein kinase 15 [Source:HGNC Symbol;Acc:HGNC:24667]	8	143716340	143722458	1	q24.3	MAPK15	protein_coding
ENSG00000254548	novel transcript	8	143718246	143718891	-1	q24.3		lncRNA
ENSG00000180921	family with sequence similarity 83 member H [Source:HGNC Symbol;Acc:HGNC:24797]	8	143723933	143738234	-1	q24.3	FAM83H	protein_coding
ENSG00000265660	microRNA 4664 [Source:HGNC Symbol;Acc:HGNC:41777]	8	143733083	143733153	-1	q24.3	MIR4664	miRNA
ENSG00000203499	IQ motif and ankyrin repeat containing 1 [Source:HGNC Symbol;Acc:HGNC:49576]	8	143734139	143790645	1	q24.3	IQANK1	protein_coding
ENSG00000254973	novel transcript	8	143758153	143771870	-1	q24.3		lncRNA
ENSG00000180900	scribble planar cell polarity protein [Source:HGNC Symbol;Acc:HGNC:30377]	8	143790920	143815773	-1	q24.3	SCRIB	protein_coding
ENSG00000284224	microRNA 937 [Source:HGNC Symbol;Acc:HGNC:33680]	8	143812957	143813042	-1	q24.3	MIR937	miRNA
ENSG00000179950	poly(U) binding splicing factor 60 [Source:HGNC Symbol;Acc:HGNC:17042]	8	143816344	143829352	-1	q24.3	PUF60	protein_coding
ENSG00000287222	novel transcript, antisense to PUF60	8	143829518	143832861	1	q24.3		lncRNA
ENSG00000255343	novel transcript, sense overlapping NRBP2 3' UTR	8	143833270	143834063	-1	q24.3		lncRNA
ENSG00000185189	nuclear receptor binding protein 2 [Source:HGNC Symbol;Acc:HGNC:19339]	8	143833583	143840973	-1	q24.3	NRBP2	protein_coding
ENSG00000284142	microRNA 6845 [Source:HGNC Symbol;Acc:HGNC:49956]	8	143837756	143837816	-1	q24.3	MIR6845	miRNA
ENSG00000285599	Novel transcript, antisense to NRBP2	8	143838779	143840256	1	q24.3		lncRNA
ENSG00000261150	epiplakin 1 [Source:HGNC Symbol;Acc:HGNC:15577]	8	143857324	143878467	-1	q24.3	EPPK1	protein_coding
ENSG00000288096	novel transcript	8	143888500	143901588	1	q24.3		lncRNA
ENSG00000178209	plectin [Source:HGNC Symbol;Acc:HGNC:9069]	8	143915153	143976734	-1	q24.3	PLEC	protein_coding
ENSG00000207574	microRNA 661 [Source:HGNC Symbol;Acc:HGNC:32917]	8	143945191	143945279	-1	q24.3	MIR661	miRNA
ENSG00000178685	poly(ADP-ribose) polymerase family member 10 [Source:HGNC Symbol;Acc:HGNC:25895]	8	143977153	144012772	-1	q24.3	PARP10	protein_coding
ENSG00000178719	glutamate ionotropic receptor NMDA type subunit associated protein 1 [Source:HGNC Symbol;Acc:HGNC:4589]	8	143990056	143993415	1	q24.3	GRINA	protein_coding
ENSG00000186583	spermatogenesis and centriole associated 1 [Source:HGNC Symbol;Acc:HGNC:30510]	8	144012280	144047114	1	q24.3	SPATC1	protein_coding
ENSG00000204791	sphingomyelin phosphodiesterase 5 (pseudogene) [Source:HGNC Symbol;Acc:HGNC:52275]	8	144049079	144051655	1	q24.3	SMPD5	transcribed_unitary_pseudogene
ENSG00000178814	5-oxoprolinase, ATP-hydrolysing [Source:HGNC Symbol;Acc:HGNC:8149]	8	144051266	144063965	-1	q24.3	OPLAH	protein_coding
ENSG00000277888	microRNA 6846 [Source:HGNC Symbol;Acc:HGNC:50026]	8	144057321	144057380	-1	q24.3	MIR6846	miRNA
ENSG00000255224	TEC	8	144078002	144079265	-1	q24.3		lncRNA
ENSG00000178896	exosome component 4 [Source:HGNC Symbol;Acc:HGNC:18189]	8	144078648	144080648	1	q24.3	EXOSC4	protein_coding
ENSG00000284200	microRNA 6847 [Source:HGNC Symbol;Acc:HGNC:50022]	8	144079874	144079942	1	q24.3	MIR6847	miRNA
ENSG00000197858	glycosylphosphatidylinositol anchor attachment 1 [Source:HGNC Symbol;Acc:HGNC:4446]	8	144082590	144086216	1	q24.3	GPAA1	protein_coding
ENSG00000179091	cytochrome c1 [Source:HGNC Symbol;Acc:HGNC:2579]	8	144095039	144097525	1	q24.3	CYC1	protein_coding
ENSG00000179526	SHANK associated RH domain interactor [Source:HGNC Symbol;Acc:HGNC:25321]	8	144098633	144108124	-1	q24.3	SHARPIN	protein_coding
ENSG00000179632	MAF1 homolog, negative regulator of RNA polymerase III [Source:HGNC Symbol;Acc:HGNC:24966]	8	144104461	144107611	1	q24.3	MAF1	protein_coding
ENSG00000179698	WD repeat domain 97 [Source:HGNC Symbol;Acc:HGNC:26959]	8	144107726	144118328	1	q24.3	WDR97	protein_coding
ENSG00000235173	HGH1 homolog [Source:HGNC Symbol;Acc:HGNC:24161]	8	144137774	144140851	1	q24.3	HGH1	protein_coding
ENSG00000227473	testis specific serine kinase 5, pseudogene [Source:HGNC Symbol;Acc:HGNC:31931]	8	144141214	144143664	-1	q24.3	TSSK5P	unitary_pseudogene
ENSG00000179832	maestro heat like repeat family member 1 [Source:HGNC Symbol;Acc:HGNC:26958]	8	144148016	144261927	1	q24.3	MROH1	protein_coding
ENSG00000261236	BOP1 ribosomal biogenesis factor [Source:HGNC Symbol;Acc:HGNC:15519]	8	144262045	144291438	-1	q24.3	BOP1	protein_coding
ENSG00000284054	microRNA 7112 [Source:HGNC Symbol;Acc:HGNC:50149]	8	144262673	144262737	-1	q24.3	MIR7112	miRNA
ENSG00000260428	scleraxis bHLH transcription factor [Source:HGNC Symbol;Acc:HGNC:32322]	8	144266453	144268481	1	q24.3	SCX	protein_coding
ENSG00000185122	heat shock transcription factor 1 [Source:HGNC Symbol;Acc:HGNC:5224]	8	144291591	144314720	1	q24.3	HSF1	protein_coding
ENSG00000185000	diacylglycerol O-acyltransferase 1 [Source:HGNC Symbol;Acc:HGNC:2843]	8	144314584	144326910	-1	q24.3	DGAT1	protein_coding
ENSG00000254690	novel transcript	8	144314590	144315138	-1	q24.3		lncRNA
ENSG00000284229	microRNA 6848 [Source:HGNC Symbol;Acc:HGNC:50176]	8	144317246	144317315	-1	q24.3	MIR6848	miRNA
ENSG00000261678	scratch family transcriptional repressor 1 [Source:HGNC Symbol;Acc:HGNC:15950]	8	144330565	144336482	-1	q24.3	SCRT1	protein_coding
ENSG00000185803	solute carrier family 52 member 2 [Source:HGNC Symbol;Acc:HGNC:30224]	8	144333957	144361286	1	q24.3	SLC52A2	protein_coding
ENSG00000261587	transmembrane protein 249 [Source:HGNC Symbol;Acc:HGNC:44155]	8	144352219	144354954	-1	q24.3	TMEM249	protein_coding
ENSG00000271698	novel transcript	8	144353228	144355609	-1	q24.3		protein_coding
ENSG00000182325	F-box and leucine rich repeat protein 6 [Source:HGNC Symbol;Acc:HGNC:13603]	8	144355431	144359376	-1	q24.3	FBXL6	protein_coding
ENSG00000173137	aarF domain containing kinase 5 [Source:HGNC Symbol;Acc:HGNC:21738]	8	144373101	144393242	1	q24.3	ADCK5	protein_coding
ENSG00000071894	cleavage and polyadenylation specific factor 1 [Source:HGNC Symbol;Acc:HGNC:2324]	8	144393229	144409335	-1	q24.3	CPSF1	protein_coding
ENSG00000284310	microRNA 939 [Source:HGNC Symbol;Acc:HGNC:33682]	8	144394149	144394230	-1	q24.3	MIR939	miRNA
ENSG00000284139	microRNA 1234 [Source:HGNC Symbol;Acc:HGNC:33926]	8	144400086	144400165	-1	q24.3	MIR1234	miRNA
ENSG00000283770	microRNA 6849 [Source:HGNC Symbol;Acc:HGNC:49991]	8	144400277	144400345	-1	q24.3	MIR6849	miRNA
ENSG00000272115	novel transcript, antisense to SLC39A4	8	144409492	144409976	1	q24.3		lncRNA
ENSG00000147804	solute carrier family 39 member 4 [Source:HGNC Symbol;Acc:HGNC:17129]	8	144409742	144416844	-1	q24.3	SLC39A4	protein_coding
ENSG00000160948	VPS28 subunit of ESCRT-I [Source:HGNC Symbol;Acc:HGNC:18178]	8	144423601	144428563	-1	q24.3	VPS28	protein_coding
ENSG00000160949	tonsoku like, DNA repair protein [Source:HGNC Symbol;Acc:HGNC:7801]	8	144428775	144444440	-1	q24.3	TONSL	protein_coding
ENSG00000276598	microRNA 6893 [Source:HGNC Symbol;Acc:HGNC:50130]	8	144435551	144435619	-1	q24.3	MIR6893	miRNA
ENSG00000232600	TONSL antisense RNA 1 [Source:HGNC Symbol;Acc:HGNC:51556]	8	144437675	144439971	1	q24.3	TONSL-AS1	lncRNA
ENSG00000187954	cysteine and histidine rich 1 [Source:HGNC Symbol;Acc:HGNC:17806]	8	144449582	144465667	-1	q24.3	CYHR1	protein_coding
ENSG00000254578	novel transcript, antisense to CYHR1	8	144463817	144465101	1	q24.3		lncRNA
ENSG00000167702	kinesin family member C2 [Source:HGNC Symbol;Acc:HGNC:29530]	8	144466043	144474202	1	q24.3	KIFC2	protein_coding
ENSG00000160973	forkhead box H1 [Source:HGNC Symbol;Acc:HGNC:3814]	8	144473412	144475849	-1	q24.3	FOXH1	protein_coding
ENSG00000160972	protein phosphatase 1 regulatory subunit 16A [Source:HGNC Symbol;Acc:HGNC:14941]	8	144477969	144502121	1	q24.3	PPP1R16A	protein_coding
ENSG00000255182	novel transcript, antisense to PPP1R16A	8	144495458	144505444	-1	q24.3		lncRNA
ENSG00000167701	glutamic--pyruvic transaminase [Source:HGNC Symbol;Acc:HGNC:4552]	8	144502973	144507174	1	q24.3	GPT	protein_coding
ENSG00000167700	major facilitator superfamily domain containing 3 [Source:HGNC Symbol;Acc:HGNC:25157]	8	144509070	144511213	1	q24.3	MFSD3	protein_coding
ENSG00000160957	RecQ like helicase 4 [Source:HGNC Symbol;Acc:HGNC:9949]	8	144511288	144517845	-1	q24.3	RECQL4	protein_coding
ENSG00000265393	novel transcript, antisense to RECQL4	8	144512567	144513672	1	q24.3		lncRNA
ENSG00000160959	leucine rich repeat containing 14 [Source:HGNC Symbol;Acc:HGNC:20419]	8	144517992	144525172	1	q24.3	LRRC14	protein_coding
ENSG00000254402	leucine rich repeat containing 24 [Source:HGNC Symbol;Acc:HGNC:28947]	8	144522388	144527033	-1	q24.3	LRRC24	protein_coding
ENSG00000213563	chromosome 8 open reading frame 82 [Source:HGNC Symbol;Acc:HGNC:33826]	8	144525733	144529132	-1	q24.3	C8orf82	protein_coding
ENSG00000147799	Rho GTPase activating protein 39 [Source:HGNC Symbol;Acc:HGNC:29351]	8	144529179	144685846	-1	q24.3	ARHGAP39	protein_coding
ENSG00000255456	novel transcript, antisense to ARHGAP39	8	144584040	144586488	1	q24.3		lncRNA
ENSG00000274772	Metazoan signal recognition particle RNA [Source:RFAM;Acc:RF00017]	8	144683169	144683464	1	q24.3	Metazoa_SRP	misc_RNA
ENSG00000254533	novel transcript	8	144698614	144699185	-1	q24.3		lncRNA
ENSG00000255085	zinc finger protein 154 (ZNF154) pseudogene	8	144700353	144708517	1	q24.3		transcribed_unprocessed_pseudogene
ENSG00000263612	novel transcript	8	144713899	144714845	1	q24.3		lncRNA
ENSG00000198169	zinc finger protein 251 [Source:HGNC Symbol;Acc:HGNC:13045]	8	144720907	144756417	-1	q24.3	ZNF251	protein_coding
ENSG00000196378	zinc finger protein 34 [Source:HGNC Symbol;Acc:HGNC:13098]	8	144772224	144787345	-1	q24.3	ZNF34	protein_coding
ENSG00000244307	RNA, 7SL, cytoplasmic 395, pseudogene [Source:HGNC Symbol;Acc:HGNC:46411]	8	144785298	144785588	1	q24.3	RN7SL395P	misc_RNA
ENSG00000161016	ribosomal protein L8 [Source:HGNC Symbol;Acc:HGNC:10368]	8	144789765	144792587	-1	q24.3	RPL8	protein_coding
ENSG00000283764	microRNA 6850 [Source:HGNC Symbol;Acc:HGNC:50093]	8	144791931	144791991	-1	q24.3	MIR6850	miRNA
ENSG00000197363	zinc finger protein 517 [Source:HGNC Symbol;Acc:HGNC:27984]	8	144798876	144811169	1	q24.3	ZNF517	protein_coding
ENSG00000147789	zinc finger protein 7 [Source:HGNC Symbol;Acc:HGNC:13139]	8	144827518	144847509	1	q24.3	ZNF7	protein_coding
ENSG00000170619	COMM domain containing 5 [Source:HGNC Symbol;Acc:HGNC:17902]	8	144841042	144853736	-1	q24.3	COMMD5	protein_coding
ENSG00000286681	novel transcript	8	144854875	144869489	-1	q24.3		lncRNA
ENSG00000196150	zinc finger protein 250 [Source:HGNC Symbol;Acc:HGNC:13044]	8	144876497	144902168	-1	q24.3	ZNF250	protein_coding
ENSG00000170631	zinc finger protein 16 [Source:HGNC Symbol;Acc:HGNC:12947]	8	144930358	144950888	-1	q24.3	ZNF16	protein_coding
ENSG00000196922	zinc finger protein 252, pseudogene [Source:HGNC Symbol;Acc:HGNC:13046]	8	144973589	145002912	-1	q24.3	ZNF252P	transcribed_unprocessed_pseudogene
ENSG00000255164	novel transcript, antisense to ZNF252	8	144992914	144994837	1	q24.3		lncRNA
ENSG00000254618	transmembrane p24 trafficking protein 10 pseudogene 1 [Source:HGNC Symbol;Acc:HGNC:30754]	8	144994886	144995540	1	q24.3	TMED10P1	processed_pseudogene
ENSG00000255559	ZNF252P antisense RNA 1 [Source:HGNC Symbol;Acc:HGNC:27821]	8	145002811	145006046	1	q24.3	ZNF252P-AS1	lncRNA
ENSG00000255530	zinc finger with KRAB and SCAN domains 1 (ZKSCAN1) pseudogene	8	145005561	145005906	-1	q24.3		processed_pseudogene
ENSG00000255000	zinc finger protein pseudogene	8	145047860	145048889	1	q24.3		processed_pseudogene
ENSG00000182307	chromosome 8 open reading frame 33 [Source:HGNC Symbol;Acc:HGNC:26104]	8	145052465	145066685	1	q24.3	C8orf33	protein_coding

## Sheet: protein_coding
Table S1.2. Protein coding statistics of 8q24. The metrics were obtained with BioMart from Ensemble release 109 and GRCh38.p13
Gene stable ID	Gene description	Chromosome/scaffold name	Gene start (bp)	Gene end (bp)	Strand	Karyotype band	Gene name	Gene type
ENSG00000147677	eukaryotic translation initiation factor 3 subunit H [Source:HGNC Symbol;Acc:HGNC:3273]	8	116642130	116766925	-1	q24.11	EIF3H	protein_coding
ENSG00000147679	UTP23 small subunit processome component [Source:HGNC Symbol;Acc:HGNC:28224]	8	116766505	116849463	1	q24.11	UTP23	protein_coding
ENSG00000164754	RAD21 cohesin complex component [Source:HGNC Symbol;Acc:HGNC:9811]	8	116845934	116874776	-1	q24.11	RAD21	protein_coding
ENSG00000205002	alanine and arginine rich domain containing protein [Source:HGNC Symbol;Acc:HGNC:33842]	8	116938207	116944487	1	q24.11	AARD	protein_coding
ENSG00000164756	solute carrier family 30 member 8 [Source:HGNC Symbol;Acc:HGNC:20303]	8	116950273	117176714	1	q24.11	SLC30A8	protein_coding
ENSG00000164758	mediator complex subunit 30 [Source:HGNC Symbol;Acc:HGNC:23032]	8	117520713	117540262	1	q24.11	MED30	protein_coding
ENSG00000182197	exostosin glycosyltransferase 1 [Source:HGNC Symbol;Acc:HGNC:3512]	8	117794490	118111826	-1	q24.11	EXT1	protein_coding
ENSG00000177570	sterile alpha motif domain containing 12 [Source:HGNC Symbol;Acc:HGNC:31750]	8	118189455	118622112	-1	q24.12	SAMD12	protein_coding
ENSG00000164761	TNF receptor superfamily member 11b [Source:HGNC Symbol;Acc:HGNC:11909]	8	118923557	118951885	-1	q24.12	TNFRSF11B	protein_coding
ENSG00000184374	collectin subfamily member 10 [Source:HGNC Symbol;Acc:HGNC:2220]	8	118995452	119108455	1	q24.12	COLEC10	protein_coding
ENSG00000147676	mal, T cell differentiation protein 2 [Source:HGNC Symbol;Acc:HGNC:13634]	8	119165034	119245673	1	q24.12	MAL2	protein_coding
ENSG00000136999	cellular communication network factor 3 [Source:HGNC Symbol;Acc:HGNC:7885]	8	119416446	119424434	1	q24.12	CCN3	protein_coding
ENSG00000136960	ectonucleotide pyrophosphatase/phosphodiesterase 2 [Source:HGNC Symbol;Acc:HGNC:3357]	8	119557086	119673453	-1	q24.12	ENPP2	protein_coding
ENSG00000064313	TATA-box binding protein associated factor 2 [Source:HGNC Symbol;Acc:HGNC:11536]	8	119730774	119832863	-1	q24.12	TAF2	protein_coding
ENSG00000136982	DNA replication and sister chromatid cohesion 1 [Source:HGNC Symbol;Acc:HGNC:24453]	8	119833976	119855894	-1	q24.12	DSCC1	protein_coding
ENSG00000155792	DEP domain containing MTOR interacting protein [Source:HGNC Symbol;Acc:HGNC:22953]	8	119873717	120050918	1	q24.12	DEPTOR	protein_coding
ENSG00000187955	collagen type XIV alpha 1 chain [Source:HGNC Symbol;Acc:HGNC:2191]	8	120059780	120373573	1	q24.12	COL14A1	protein_coding
ENSG00000172172	mitochondrial ribosomal protein L13 [Source:HGNC Symbol;Acc:HGNC:14278]	8	120380761	120445402	-1	q24.12	MRPL13	protein_coding
ENSG00000172167	MDM2 binding protein [Source:HGNC Symbol;Acc:HGNC:7417]	8	120445400	120542133	1	q24.12	MTBP	protein_coding
ENSG00000172164	syntrophin beta 1 [Source:HGNC Symbol;Acc:HGNC:11168]	8	120535745	120813273	-1	q24.12	SNTB1	protein_coding
ENSG00000170961	hyaluronan synthase 2 [Source:HGNC Symbol;Acc:HGNC:4819]	8	121612116	121641440	-1	q24.13	HAS2	protein_coding
ENSG00000178764	zinc fingers and homeoboxes 2 [Source:HGNC Symbol;Acc:HGNC:18513]	8	122781655	122974510	1	q24.13	ZHX2	protein_coding
ENSG00000136986	derlin 1 [Source:HGNC Symbol;Acc:HGNC:28454]	8	123013170	123042302	-1	q24.13	DERL1	protein_coding
ENSG00000156787	TBC1 domain family member 31 [Source:HGNC Symbol;Acc:HGNC:30888]	8	123041968	123152153	1	q24.13	TBC1D31	protein_coding
ENSG00000147689	family with sequence similarity 83 member A [Source:HGNC Symbol;Acc:HGNC:28210]	8	123178960	123210079	1	q24.13	FAM83A	protein_coding
ENSG00000189376	chromosome 8 open reading frame 76 [Source:HGNC Symbol;Acc:HGNC:25924]	8	123219967	123241377	-1	q24.13	C8orf76	protein_coding
ENSG00000259305	ZHX1-C8orf76 readthrough [Source:HGNC Symbol;Acc:HGNC:42975]	8	123226189	123274284	-1	q24.13	ZHX1-C8orf76	protein_coding
ENSG00000165156	zinc fingers and homeoboxes 1 [Source:HGNC Symbol;Acc:HGNC:12871]	8	123248451	123275541	-1	q24.13	ZHX1	protein_coding
ENSG00000156802	ATPase family AAA domain containing 2 [Source:HGNC Symbol;Acc:HGNC:30123]	8	123319850	123416350	-1	q24.13	ATAD2	protein_coding
ENSG00000156795	N-terminal glutamine amidase 1 [Source:HGNC Symbol;Acc:HGNC:25490]	8	123416726	123470028	1	q24.13	NTAQ1	protein_coding
ENSG00000156804	F-box protein 32 [Source:HGNC Symbol;Acc:HGNC:16731]	8	123497889	123541206	-1	q24.13	FBXO32	protein_coding
ENSG00000175946	kelch like family member 38 [Source:HGNC Symbol;Acc:HGNC:34435]	8	123644442	123653801	-1	q24.13	KLHL38	protein_coding
ENSG00000104537	annexin A13 [Source:HGNC Symbol;Acc:HGNC:536]	8	123680794	123737402	-1	q24.13	ANXA13	protein_coding
ENSG00000176853	family with sequence similarity 91 member A1 [Source:HGNC Symbol;Acc:HGNC:26306]	8	123768439	123815452	1	q24.13	FAM91A1	protein_coding
ENSG00000214814	fer-1 like family member 6 [Source:HGNC Symbol;Acc:HGNC:28065]	8	123851987	124120061	1	q24.13	FER1L6	protein_coding
ENSG00000164983	transmembrane protein 65 [Source:HGNC Symbol;Acc:HGNC:25203]	8	124306189	124372701	-1	q24.13	TMEM65	protein_coding
ENSG00000183665	tRNA methyltransferase 12 homolog [Source:HGNC Symbol;Acc:HGNC:26091]	8	124450820	124462150	1	q24.13	TRMT12	protein_coding
ENSG00000170881	ring finger protein 139 [Source:HGNC Symbol;Acc:HGNC:17023]	8	124474880	124488618	1	q24.13	RNF139	protein_coding
ENSG00000147687	TatD DNase domain containing 1 [Source:HGNC Symbol;Acc:HGNC:24220]	8	124488485	124539458	-1	q24.13	TATDN1	protein_coding
ENSG00000147684	NADH:ubiquinone oxidoreductase subunit B9 [Source:HGNC Symbol;Acc:HGNC:7704]	8	124539101	124580648	1	q24.13	NDUFB9	protein_coding
ENSG00000170873	MTSS I-BAR domain containing 1 [Source:HGNC Symbol;Acc:HGNC:20443]	8	124550784	124728473	-1	q24.13	MTSS1	protein_coding
ENSG00000180938	zinc finger protein 572 [Source:HGNC Symbol;Acc:HGNC:26758]	8	124973295	124979389	1	q24.13	ZNF572	protein_coding
ENSG00000104549	squalene epoxidase [Source:HGNC Symbol;Acc:HGNC:11279]	8	124998497	125022283	1	q24.13	SQLE	protein_coding
ENSG00000164961	WASH complex subunit 5 [Source:HGNC Symbol;Acc:HGNC:28984]	8	125024260	125091819	-1	q24.13	WASHC5	protein_coding
ENSG00000156831	NSE2 (MMS21) homolog, SMC5-SMC6 complex SUMO ligase [Source:HGNC Symbol;Acc:HGNC:26513]	8	125091679	125367120	1	q24.13	NSMCE2	protein_coding
ENSG00000173334	tribbles pseudokinase 1 [Source:HGNC Symbol;Acc:HGNC:16891]	8	125430358	125438403	1	q24.13	TRIB1	protein_coding
ENSG00000168672	LRAT domain containing 2 [Source:HGNC Symbol;Acc:HGNC:24166]	8	126552443	126558478	-1	q24.21	LRATD2	protein_coding
ENSG00000212993	POU class 5 homeobox 1B [Source:HGNC Symbol;Acc:HGNC:9223]	8	127322183	127420066	1	q24.21	POU5F1B	protein_coding
ENSG00000136997	MYC proto-oncogene, bHLH transcription factor [Source:HGNC Symbol;Acc:HGNC:7553]	8	127735434	127742951	1	q24.21	MYC	protein_coding
ENSG00000147697	gasdermin C [Source:HGNC Symbol;Acc:HGNC:7151]	8	129748196	129786624	-1	q24.21	GSDMC	protein_coding
ENSG00000153310	CYFIP related Rac1 interactor B [Source:HGNC Symbol;Acc:HGNC:25216]	8	129839593	130017129	-1	q24.21	CYRIB	protein_coding
ENSG00000153317	ArfGAP with SH3 domain, ankyrin repeat and PH domain 1 [Source:HGNC Symbol;Acc:HGNC:2720]	8	130052104	130443674	-1	q24.22	ASAP1	protein_coding
ENSG00000155897	adenylate cyclase 8 [Source:HGNC Symbol;Acc:HGNC:239]	8	130780301	131040909	-1	q24.22	ADCY8	protein_coding
ENSG00000132294	EFR3 homolog A [Source:HGNC Symbol;Acc:HGNC:28970]	8	131904093	132013642	1	q24.22	EFR3A	protein_coding
ENSG00000253117	otoconin 90 [Source:HGNC Symbol;Acc:HGNC:8100]	8	132024216	132059382	-1	q24.22	OC90	protein_coding
ENSG00000258417	novel protein	8	132024238	132085655	-1	q24.22		protein_coding
ENSG00000132297	HERV-H LTR-associating 1 [Source:HGNC Symbol;Acc:HGNC:4904]	8	132061480	132111159	-1	q24.22	HHLA1	protein_coding
ENSG00000184156	potassium voltage-gated channel subfamily Q member 3 [Source:HGNC Symbol;Acc:HGNC:6297]	8	132120859	132481095	-1	q24.22	KCNQ3	protein_coding
ENSG00000129295	dynein axonemal assembly factor 11 [Source:HGNC Symbol;Acc:HGNC:16725]	8	132570416	132675592	-1	q24.22	DNAAF11	protein_coding
ENSG00000165071	transmembrane protein 71 [Source:HGNC Symbol;Acc:HGNC:26572]	8	132685007	132760712	-1	q24.22	TMEM71	protein_coding
ENSG00000129292	PHD finger protein 20 like 1 [Source:HGNC Symbol;Acc:HGNC:24280]	8	132775358	132848807	1	q24.22	PHF20L1	protein_coding
ENSG00000042832	thyroglobulin [Source:HGNC Symbol;Acc:HGNC:11764]	8	132866958	133134903	1	q24.22	TG	protein_coding
ENSG00000155926	Src like adaptor [Source:HGNC Symbol;Acc:HGNC:10902]	8	133036728	133102912	-1	q24.22	SLA	protein_coding
ENSG00000104415	cellular communication network factor 4 [Source:HGNC Symbol;Acc:HGNC:12769]	8	133191039	133231690	1	q24.22	CCN4	protein_coding
ENSG00000104419	N-myc downstream regulated 1 [Source:HGNC Symbol;Acc:HGNC:7679]	8	133237175	133302022	-1	q24.22	NDRG1	protein_coding
ENSG00000008513	ST3 beta-galactoside alpha-2,3-sialyltransferase 1 [Source:HGNC Symbol;Acc:HGNC:10862]	8	133454848	133571940	-1	q24.22	ST3GAL1	protein_coding
ENSG00000066827	zinc finger and AT-hook domain containing [Source:HGNC Symbol;Acc:HGNC:19899]	8	134477788	134713049	-1	q24.22	ZFAT	protein_coding
ENSG00000131773	KH RNA binding domain containing, signal transduction associated 3 [Source:HGNC Symbol;Acc:HGNC:18117]	8	135457456	135656722	1	q24.23	KHDRBS3	protein_coding
ENSG00000147724	family with sequence similarity 135 member B [Source:HGNC Symbol;Acc:HGNC:28029]	8	138130023	138497261	-1	q24.23	FAM135B	protein_coding
ENSG00000169436	collagen type XXII alpha 1 chain [Source:HGNC Symbol;Acc:HGNC:22989]	8	138588235	138914041	-1	q24.3	COL22A1	protein_coding
ENSG00000169427	potassium two pore domain channel subfamily K member 9 [Source:HGNC Symbol;Acc:HGNC:6283]	8	139600838	139704109	-1	q24.3	KCNK9	protein_coding
ENSG00000167632	trafficking protein particle complex subunit 9 [Source:HGNC Symbol;Acc:HGNC:30832]	8	139727725	140458579	-1	q24.3	TRAPPC9	protein_coding
ENSG00000104472	chromatin accessibility complex subunit 1 [Source:HGNC Symbol;Acc:HGNC:13544]	8	140511311	140517154	1	q24.3	CHRAC1	protein_coding
ENSG00000123908	argonaute RISC catalytic component 2 [Source:HGNC Symbol;Acc:HGNC:3263]	8	140520156	140635633	-1	q24.3	AGO2	protein_coding
ENSG00000169398	protein tyrosine kinase 2 [Source:HGNC Symbol;Acc:HGNC:9611]	8	140657900	141002216	-1	q24.3	PTK2	protein_coding
ENSG00000105339	DENN domain containing 3 [Source:HGNC Symbol;Acc:HGNC:29134]	8	141117278	141195808	1	q24.3	DENND3	protein_coding
ENSG00000022567	solute carrier family 45 member 4 [Source:HGNC Symbol;Acc:HGNC:29196]	8	141207166	141308305	-1	q24.3	SLC45A4	protein_coding
ENSG00000204882	G protein-coupled receptor 20 [Source:HGNC Symbol;Acc:HGNC:4475]	8	141356470	141367286	-1	q24.3	GPR20	protein_coding
ENSG00000184489	protein tyrosine phosphatase 4A3 [Source:HGNC Symbol;Acc:HGNC:9636]	8	141391995	141432454	1	q24.3	PTP4A3	protein_coding
ENSG00000226490	novel protein	8	141514638	141518737	1	q24.3		protein_coding
ENSG00000171045	t-SNARE domain containing 1 [Source:HGNC Symbol;Acc:HGNC:26437]	8	142212080	142403182	-1	q24.3	TSNARE1	protein_coding
ENSG00000181790	adhesion G protein-coupled receptor B1 [Source:HGNC Symbol;Acc:HGNC:943]	8	142449430	142545009	1	q24.3	ADGRB1	protein_coding
ENSG00000198576	activity regulated cytoskeleton associated protein [Source:HGNC Symbol;Acc:HGNC:648]	8	142611049	142614479	-1	q24.3	ARC	protein_coding
ENSG00000234616	Jrk helix-turn-helix protein [Source:HGNC Symbol;Acc:HGNC:6199]	8	142657460	142681968	-1	q24.3	JRK	protein_coding
ENSG00000167653	prostate stem cell antigen [Source:HGNC Symbol;Acc:HGNC:9500]	8	142670308	142682725	1	q24.3	PSCA	protein_coding
ENSG00000160886	lymphocyte antigen 6 family member K [Source:HGNC Symbol;Acc:HGNC:24225]	8	142700111	142705127	1	q24.3	LY6K	protein_coding
ENSG00000130193	thioesterase superfamily member 6 [Source:HGNC Symbol;Acc:HGNC:29656]	8	142727223	142736927	1	q24.3	THEM6	protein_coding
ENSG00000126233	secreted LY6/PLAUR domain containing 1 [Source:HGNC Symbol;Acc:HGNC:18746]	8	142740949	142742406	-1	q24.3	SLURP1	protein_coding
ENSG00000197353	LY6/PLAUR domain containing 2 [Source:HGNC Symbol;Acc:HGNC:25215]	8	142750150	142752532	-1	q24.3	LYPD2	protein_coding
ENSG00000284505	LYNX1-SLURP2 readthrough [Source:HGNC Symbol;Acc:HGNC:52291]	8	142764334	142778224	-1	q24.3	LYNX1-SLURP2	protein_coding
ENSG00000283992	secreted LY6/PLAUR domain containing 2 [Source:HGNC Symbol;Acc:HGNC:25549]	8	142764338	142769828	-1	q24.3	SLURP2	protein_coding
ENSG00000180155	Ly6/neurotoxin 1 [Source:HGNC Symbol;Acc:HGNC:29604]	8	142771197	142777810	-1	q24.3	LYNX1	protein_coding
ENSG00000167656	lymphocyte antigen 6 family member D [Source:HGNC Symbol;Acc:HGNC:13348]	8	142784882	142786539	-1	q24.3	LY6D	protein_coding
ENSG00000104499	glycosylphosphatidylinositol anchored molecule like [Source:HGNC Symbol;Acc:HGNC:4375]	8	142834247	142916506	1	q24.3	GML	protein_coding
ENSG00000160882	cytochrome P450 family 11 subfamily B member 1 [Source:HGNC Symbol;Acc:HGNC:2591]	8	142872356	142879846	-1	q24.3	CYP11B1	protein_coding
ENSG00000179142	cytochrome P450 family 11 subfamily B member 2 [Source:HGNC Symbol;Acc:HGNC:2592]	8	142910559	142917843	-1	q24.3	CYP11B2	protein_coding
ENSG00000160932	lymphocyte antigen 6 family member E [Source:HGNC Symbol;Acc:HGNC:6727]	8	143017982	143023832	1	q24.3	LY6E	protein_coding
ENSG00000261667	lymphocyte antigen 6 family member L [Source:HGNC Symbol;Acc:HGNC:52284]	8	143080630	143083486	1	q24.3	LY6L	protein_coding
ENSG00000176956	lymphocyte antigen 6 family member H [Source:HGNC Symbol;Acc:HGNC:6728]	8	143157914	143160711	-1	q24.3	LY6H	protein_coding
ENSG00000277494	glycosylphosphatidylinositol anchored high density lipoprotein binding protein 1 [Source:HGNC Symbol;Acc:HGNC:24945]	8	143213218	143217170	1	q24.3	GPIHBP1	protein_coding
ENSG00000181638	ZFP41 zinc finger protein [Source:HGNC Symbol;Acc:HGNC:26786]	8	143246821	143262705	1	q24.3	ZFP41	protein_coding
ENSG00000264668	novel protein	8	143247110	143276403	1	q24.3		protein_coding
ENSG00000250571	GLI family zinc finger 4 [Source:HGNC Symbol;Acc:HGNC:4320]	8	143267433	143276931	1	q24.3	GLI4	protein_coding
ENSG00000185730	zinc finger protein 696 [Source:HGNC Symbol;Acc:HGNC:25872]	8	143289676	143299952	1	q24.3	ZNF696	protein_coding
ENSG00000184428	DNA topoisomerase I mitochondrial [Source:HGNC Symbol;Acc:HGNC:29787]	8	143304384	143359979	-1	q24.3	TOP1MT	protein_coding
ENSG00000158106	rhophilin Rho GTPase binding protein 1 [Source:HGNC Symbol;Acc:HGNC:19973]	8	143368876	143384221	1	q24.3	RHPN1	protein_coding
ENSG00000182759	MAF bZIP transcription factor A [Source:HGNC Symbol;Acc:HGNC:23145]	8	143419182	143430732	-1	q24.3	MAFA	protein_coding
ENSG00000014164	zinc finger CCCH-type containing 3 [Source:HGNC Symbol;Acc:HGNC:28972]	8	143437659	143541447	-1	q24.3	ZC3H3	protein_coding
ENSG00000104518	gasdermin D [Source:HGNC Symbol;Acc:HGNC:25697]	8	143553207	143563062	1	q24.3	GSDMD	protein_coding
ENSG00000204839	maestro heat like repeat family member 6 [Source:HGNC Symbol;Acc:HGNC:27814]	8	143566192	143572772	-1	q24.3	MROH6	protein_coding
ENSG00000147813	nicotinate phosphoribosyltransferase [Source:HGNC Symbol;Acc:HGNC:30450]	8	143574785	143578649	-1	q24.3	NAPRT	protein_coding
ENSG00000104529	eukaryotic translation elongation factor 1 delta [Source:HGNC Symbol;Acc:HGNC:3211]	8	143579697	143599541	-1	q24.3	EEF1D	protein_coding
ENSG00000179886	tigger transposable element derived 5 [Source:HGNC Symbol;Acc:HGNC:18336]	8	143597831	143603224	1	q24.3	TIGD5	protein_coding
ENSG00000104524	pyrroline-5-carboxylate reductase 3 [Source:HGNC Symbol;Acc:HGNC:25846]	8	143603210	143609773	-1	q24.3	PYCR3	protein_coding
ENSG00000104522	GDP-L-fucose synthase [Source:HGNC Symbol;Acc:HGNC:12390]	8	143612618	143618048	-1	q24.3	GFUS	protein_coding
ENSG00000183309	zinc finger protein 623 [Source:HGNC Symbol;Acc:HGNC:29084]	8	143636019	143656418	1	q24.3	ZNF623	protein_coding
ENSG00000181135	zinc finger protein 707 [Source:HGNC Symbol;Acc:HGNC:27815]	8	143684452	143713898	1	q24.3	ZNF707	protein_coding
ENSG00000255181	coiled-coil domain containing 166 [Source:HGNC Symbol;Acc:HGNC:41910]	8	143706694	143708109	-1	q24.3	CCDC166	protein_coding
ENSG00000181085	mitogen-activated protein kinase 15 [Source:HGNC Symbol;Acc:HGNC:24667]	8	143716340	143722458	1	q24.3	MAPK15	protein_coding
ENSG00000180921	family with sequence similarity 83 member H [Source:HGNC Symbol;Acc:HGNC:24797]	8	143723933	143738234	-1	q24.3	FAM83H	protein_coding
ENSG00000203499	IQ motif and ankyrin repeat containing 1 [Source:HGNC Symbol;Acc:HGNC:49576]	8	143734139	143790645	1	q24.3	IQANK1	protein_coding
ENSG00000180900	scribble planar cell polarity protein [Source:HGNC Symbol;Acc:HGNC:30377]	8	143790920	143815773	-1	q24.3	SCRIB	protein_coding
ENSG00000179950	poly(U) binding splicing factor 60 [Source:HGNC Symbol;Acc:HGNC:17042]	8	143816344	143829352	-1	q24.3	PUF60	protein_coding
ENSG00000185189	nuclear receptor binding protein 2 [Source:HGNC Symbol;Acc:HGNC:19339]	8	143833583	143840973	-1	q24.3	NRBP2	protein_coding
ENSG00000261150	epiplakin 1 [Source:HGNC Symbol;Acc:HGNC:15577]	8	143857324	143878467	-1	q24.3	EPPK1	protein_coding
ENSG00000178209	plectin [Source:HGNC Symbol;Acc:HGNC:9069]	8	143915153	143976734	-1	q24.3	PLEC	protein_coding
ENSG00000178685	poly(ADP-ribose) polymerase family member 10 [Source:HGNC Symbol;Acc:HGNC:25895]	8	143977153	144012772	-1	q24.3	PARP10	protein_coding
ENSG00000178719	glutamate ionotropic receptor NMDA type subunit associated protein 1 [Source:HGNC Symbol;Acc:HGNC:4589]	8	143990056	143993415	1	q24.3	GRINA	protein_coding
ENSG00000186583	spermatogenesis and centriole associated 1 [Source:HGNC Symbol;Acc:HGNC:30510]	8	144012280	144047114	1	q24.3	SPATC1	protein_coding
ENSG00000178814	5-oxoprolinase, ATP-hydrolysing [Source:HGNC Symbol;Acc:HGNC:8149]	8	144051266	144063965	-1	q24.3	OPLAH	protein_coding
ENSG00000178896	exosome component 4 [Source:HGNC Symbol;Acc:HGNC:18189]	8	144078648	144080648	1	q24.3	EXOSC4	protein_coding
ENSG00000197858	glycosylphosphatidylinositol anchor attachment 1 [Source:HGNC Symbol;Acc:HGNC:4446]	8	144082590	144086216	1	q24.3	GPAA1	protein_coding
ENSG00000179091	cytochrome c1 [Source:HGNC Symbol;Acc:HGNC:2579]	8	144095039	144097525	1	q24.3	CYC1	protein_coding
ENSG00000179526	SHANK associated RH domain interactor [Source:HGNC Symbol;Acc:HGNC:25321]	8	144098633	144108124	-1	q24.3	SHARPIN	protein_coding
ENSG00000179632	MAF1 homolog, negative regulator of RNA polymerase III [Source:HGNC Symbol;Acc:HGNC:24966]	8	144104461	144107611	1	q24.3	MAF1	protein_coding
ENSG00000179698	WD repeat domain 97 [Source:HGNC Symbol;Acc:HGNC:26959]	8	144107726	144118328	1	q24.3	WDR97	protein_coding
ENSG00000235173	HGH1 homolog [Source:HGNC Symbol;Acc:HGNC:24161]	8	144137774	144140851	1	q24.3	HGH1	protein_coding
ENSG00000179832	maestro heat like repeat family member 1 [Source:HGNC Symbol;Acc:HGNC:26958]	8	144148016	144261927	1	q24.3	MROH1	protein_coding
ENSG00000261236	BOP1 ribosomal biogenesis factor [Source:HGNC Symbol;Acc:HGNC:15519]	8	144262045	144291438	-1	q24.3	BOP1	protein_coding
ENSG00000260428	scleraxis bHLH transcription factor [Source:HGNC Symbol;Acc:HGNC:32322]	8	144266453	144268481	1	q24.3	SCX	protein_coding
ENSG00000185122	heat shock transcription factor 1 [Source:HGNC Symbol;Acc:HGNC:5224]	8	144291591	144314720	1	q24.3	HSF1	protein_coding
ENSG00000185000	diacylglycerol O-acyltransferase 1 [Source:HGNC Symbol;Acc:HGNC:2843]	8	144314584	144326910	-1	q24.3	DGAT1	protein_coding
ENSG00000261678	scratch family transcriptional repressor 1 [Source:HGNC Symbol;Acc:HGNC:15950]	8	144330565	144336482	-1	q24.3	SCRT1	protein_coding
ENSG00000185803	solute carrier family 52 member 2 [Source:HGNC Symbol;Acc:HGNC:30224]	8	144333957	144361286	1	q24.3	SLC52A2	protein_coding
ENSG00000261587	transmembrane protein 249 [Source:HGNC Symbol;Acc:HGNC:44155]	8	144352219	144354954	-1	q24.3	TMEM249	protein_coding
ENSG00000271698	novel transcript	8	144353228	144355609	-1	q24.3		protein_coding
ENSG00000182325	F-box and leucine rich repeat protein 6 [Source:HGNC Symbol;Acc:HGNC:13603]	8	144355431	144359376	-1	q24.3	FBXL6	protein_coding
ENSG00000173137	aarF domain containing kinase 5 [Source:HGNC Symbol;Acc:HGNC:21738]	8	144373101	144393242	1	q24.3	ADCK5	protein_coding
ENSG00000071894	cleavage and polyadenylation specific factor 1 [Source:HGNC Symbol;Acc:HGNC:2324]	8	144393229	144409335	-1	q24.3	CPSF1	protein_coding
ENSG00000147804	solute carrier family 39 member 4 [Source:HGNC Symbol;Acc:HGNC:17129]	8	144409742	144416844	-1	q24.3	SLC39A4	protein_coding
ENSG00000160948	VPS28 subunit of ESCRT-I [Source:HGNC Symbol;Acc:HGNC:18178]	8	144423601	144428563	-1	q24.3	VPS28	protein_coding
ENSG00000160949	tonsoku like, DNA repair protein [Source:HGNC Symbol;Acc:HGNC:7801]	8	144428775	144444440	-1	q24.3	TONSL	protein_coding
ENSG00000187954	cysteine and histidine rich 1 [Source:HGNC Symbol;Acc:HGNC:17806]	8	144449582	144465667	-1	q24.3	CYHR1	protein_coding
ENSG00000167702	kinesin family member C2 [Source:HGNC Symbol;Acc:HGNC:29530]	8	144466043	144474202	1	q24.3	KIFC2	protein_coding
ENSG00000160973	forkhead box H1 [Source:HGNC Symbol;Acc:HGNC:3814]	8	144473412	144475849	-1	q24.3	FOXH1	protein_coding
ENSG00000160972	protein phosphatase 1 regulatory subunit 16A [Source:HGNC Symbol;Acc:HGNC:14941]	8	144477969	144502121	1	q24.3	PPP1R16A	protein_coding
ENSG00000167701	glutamic--pyruvic transaminase [Source:HGNC Symbol;Acc:HGNC:4552]	8	144502973	144507174	1	q24.3	GPT	protein_coding
ENSG00000167700	major facilitator superfamily domain containing 3 [Source:HGNC Symbol;Acc:HGNC:25157]	8	144509070	144511213	1	q24.3	MFSD3	protein_coding
ENSG00000160957	RecQ like helicase 4 [Source:HGNC Symbol;Acc:HGNC:9949]	8	144511288	144517845	-1	q24.3	RECQL4	protein_coding
ENSG00000160959	leucine rich repeat containing 14 [Source:HGNC Symbol;Acc:HGNC:20419]	8	144517992	144525172	1	q24.3	LRRC14	protein_coding
ENSG00000254402	leucine rich repeat containing 24 [Source:HGNC Symbol;Acc:HGNC:28947]	8	144522388	144527033	-1	q24.3	LRRC24	protein_coding
ENSG00000213563	chromosome 8 open reading frame 82 [Source:HGNC Symbol;Acc:HGNC:33826]	8	144525733	144529132	-1	q24.3	C8orf82	protein_coding
ENSG00000147799	Rho GTPase activating protein 39 [Source:HGNC Symbol;Acc:HGNC:29351]	8	144529179	144685846	-1	q24.3	ARHGAP39	protein_coding
ENSG00000198169	zinc finger protein 251 [Source:HGNC Symbol;Acc:HGNC:13045]	8	144720907	144756417	-1	q24.3	ZNF251	protein_coding
ENSG00000196378	zinc finger protein 34 [Source:HGNC Symbol;Acc:HGNC:13098]	8	144772224	144787345	-1	q24.3	ZNF34	protein_coding
ENSG00000161016	ribosomal protein L8 [Source:HGNC Symbol;Acc:HGNC:10368]	8	144789765	144792587	-1	q24.3	RPL8	protein_coding
ENSG00000197363	zinc finger protein 517 [Source:HGNC Symbol;Acc:HGNC:27984]	8	144798876	144811169	1	q24.3	ZNF517	protein_coding
ENSG00000147789	zinc finger protein 7 [Source:HGNC Symbol;Acc:HGNC:13139]	8	144827518	144847509	1	q24.3	ZNF7	protein_coding
ENSG00000170619	COMM domain containing 5 [Source:HGNC Symbol;Acc:HGNC:17902]	8	144841042	144853736	-1	q24.3	COMMD5	protein_coding
ENSG00000196150	zinc finger protein 250 [Source:HGNC Symbol;Acc:HGNC:13044]	8	144876497	144902168	-1	q24.3	ZNF250	protein_coding
ENSG00000170631	zinc finger protein 16 [Source:HGNC Symbol;Acc:HGNC:12947]	8	144930358	144950888	-1	q24.3	ZNF16	protein_coding
ENSG00000182307	chromosome 8 open reading frame 33 [Source:HGNC Symbol;Acc:HGNC:26104]	8	145052465	145066685	1	q24.3	C8orf33	protein_coding

## Sheet: lncRNA
Table S1.3. Long no coding RNA statistics of 8q24. The metrics were obtained with BioMart from Ensemble release 109 and GRCh38.p13.
Gene stable ID	Gene description	Chromosome/scaffold name	Gene start (bp)	Gene end (bp)	Strand	Karyotype band	Gene name	Gene type
ENSG00000253327	RAD21 antisense RNA 1 [Source:HGNC Symbol;Acc:HGNC:32158]	8	116874424	116876868	1	q24.11	RAD21-AS1	lncRNA
ENSG00000253622	novel transcript	8	117128455	117130299	1	q24.11		lncRNA
ENSG00000286308	novel transcript	8	117265272	117318701	1	q24.11		lncRNA
ENSG00000225885	novel transcript, antisense to SAMD12	8	118282139	118400605	1	q24.11		lncRNA
ENSG00000281641	SAMD12 antisense RNA 1 [Source:HGNC Symbol;Acc:HGNC:30937]	8	118620498	118906155	1	q24.12	SAMD12-AS1	lncRNA
ENSG00000254278	novel transcript	8	119062942	119068782	-1	q24.12		lncRNA
ENSG00000253972	MAL2 antisense RNA 1 [Source:HGNC Symbol;Acc:HGNC:53626]	8	119214625	119246848	-1	q24.12	MAL2-AS1	lncRNA
ENSG00000286282	novel transcript, antisense to NOV	8	119350291	119416947	-1	q24.12		lncRNA
ENSG00000253398	novel transcript	8	119419910	119462350	-1	q24.12		lncRNA
ENSG00000286362	novel transcript, antisense to DSCC1	8	119832875	119855509	1	q24.12		lncRNA
ENSG00000245330	DEPTOR antisense RNA 1 [Source:HGNC Symbol;Acc:HGNC:55602]	8	119867419	119874488	-1	q24.12	DEPTOR-AS1	lncRNA
ENSG00000254343	novel transcript	8	120052180	120056201	1	q24.12		lncRNA
ENSG00000248318	novel transcript	8	120761253	120776832	1	q24.12		lncRNA
ENSG00000272502	novel transcript	8	120812219	120813359	1	q24.12		lncRNA
ENSG00000253619	novel transcript	8	120913065	121119754	1	q24.12		lncRNA
ENSG00000248690	HAS2 antisense RNA 1 [Source:HGNC Symbol;Acc:HGNC:34340]	8	121639293	121994185	1	q24.13	HAS2-AS1	lncRNA
ENSG00000254209	long intergenic non-protein coding RNA 2855 [Source:HGNC Symbol;Acc:HGNC:54392]	8	121668934	121697600	-1	q24.13	LINC02855	lncRNA
ENSG00000254303	novel transcript	8	121954640	122127184	-1	q24.13		lncRNA
ENSG00000255364	smooth muscle induced lncRNA, enhancer of proliferation [Source:HGNC Symbol;Acc:HGNC:51825]	8	122414332	122428551	-1	q24.13	SMILR	lncRNA
ENSG00000253819	long intergenic non-protein coding RNA 1151 [Source:HGNC Symbol;Acc:HGNC:49471]	8	122485194	122733804	-1	q24.13	LINC01151	lncRNA
ENSG00000255325	novel transcript	8	122485515	122489815	-1	q24.13		lncRNA
ENSG00000263443	novel transcript	8	122700269	122703423	-1	q24.13		lncRNA
ENSG00000272384	novel transcript	8	122779971	122780830	-1	q24.13		lncRNA
ENSG00000272043	novel transcript	8	122780760	122781071	1	q24.13		lncRNA
ENSG00000253372	novel transcript	8	122807746	122816517	1	q24.13		lncRNA
ENSG00000259631	novel transcript	8	122977026	122985629	-1	q24.13		lncRNA
ENSG00000253607	novel transcript, antisense to DERL1	8	123002560	123030751	1	q24.13		lncRNA
ENSG00000287657	novel transcript	8	123157729	123165173	1	q24.13		lncRNA
ENSG00000253258	novel transcript, antisense to FAM83A	8	123181638	123182788	-1	q24.13		lncRNA
ENSG00000204949	FAM83A antisense RNA 1 [Source:HGNC Symbol;Acc:HGNC:48658]	8	123193651	123202743	-1	q24.13	FAM83A-AS1	lncRNA
ENSG00000254113	novel transcript	8	123563070	123568762	-1	q24.13		lncRNA
ENSG00000253286	novel transcript	8	123614219	123667248	1	q24.13		lncRNA
ENSG00000254000	novel transcript	8	123924759	123925933	-1	q24.13		lncRNA
ENSG00000181171	FER1L6 antisense RNA 1 [Source:HGNC Symbol;Acc:HGNC:26652]	8	123984138	124040782	-1	q24.13	FER1L6-AS1	lncRNA
ENSG00000254249	novel transcript	8	124036010	124040468	-1	q24.13		lncRNA
ENSG00000253868	FER1L6 antisense RNA 2 [Source:HGNC Symbol;Acc:HGNC:26534]	8	124044395	124171522	-1	q24.13	FER1L6-AS2	lncRNA
ENSG00000214803	novel transcript	8	124192671	124247398	-1	q24.13		lncRNA
ENSG00000253227	novel transcript	8	124271667	124279580	1	q24.13		lncRNA
ENSG00000245149	RNF139 divergent transcript [Source:HGNC Symbol;Acc:HGNC:48940]	8	124462485	124474582	-1	q24.13	RNF139-DT	lncRNA
ENSG00000253106	novel transcript, antisense to TATDN1	8	124488510	124491643	1	q24.13		lncRNA
ENSG00000255491	novel transcript	8	124811042	124857516	-1	q24.13		lncRNA
ENSG00000249816	long intergenic non-protein coding RNA 964 [Source:HGNC Symbol;Acc:HGNC:27226]	8	124823702	124962531	1	q24.13	LINC00964	lncRNA
ENSG00000255313	novel transcript	8	124936328	124943765	-1	q24.13		lncRNA
ENSG00000286955	novel transcript	8	124940041	124941909	-1	q24.13		lncRNA
ENSG00000253513	SQLE divergent transcript [Source:HGNC Symbol;Acc:HGNC:55534]	8	124996985	124998198	-1	q24.13	SQLE-DT	lncRNA
ENSG00000253167	WASHC5 antisense RNA 1 [Source:HGNC Symbol;Acc:HGNC:43440]	8	125040684	125044989	1	q24.13	WASHC5-AS1	lncRNA
ENSG00000254431	novel transcript	8	125348196	125351416	-1	q24.13		lncRNA
ENSG00000253111	novel transcript	8	125466939	125541373	1	q24.13		lncRNA
ENSG00000286122	novel transcript	8	125648327	126008930	1	q24.13		lncRNA
ENSG00000253470	novel transcript	8	125749055	125750241	-1	q24.13		lncRNA
ENSG00000245164	long intergenic non-protein coding RNA 861 [Source:HGNC Symbol;Acc:HGNC:45133]	8	125859721	126292788	-1	q24.13	LINC00861	lncRNA
ENSG00000254227	novel transcript	8	125998994	126001001	-1	q24.13		lncRNA
ENSG00000244791	novel transcript	8	126325454	126329538	1	q24.21		lncRNA
ENSG00000253427	novel transcript	8	126474189	126492596	1	q24.21		lncRNA
ENSG00000253220	novel transcript	8	126497385	126500440	1	q24.21		lncRNA
ENSG00000253530	novel transcript	8	126506326	126522360	1	q24.21		lncRNA
ENSG00000253438	prostate cancer associated transcript 1 [Source:HGNC Symbol;Acc:HGNC:43022]	8	126556323	127419050	1	q24.21	PCAT1	lncRNA
ENSG00000253573	novel transcript	8	126766196	126846981	-1	q24.21		lncRNA
ENSG00000254166	cancer susceptibility 19 [Source:HGNC Symbol;Acc:HGNC:49476]	8	127072694	127227541	-1	q24.21	CASC19	lncRNA
ENSG00000282961	prostate cancer associated non-coding RNA 1 [Source:HGNC Symbol;Acc:HGNC:48942]	8	127079874	127092600	1	q24.21	PRNCR1	lncRNA
ENSG00000287781	novel transcript	8	127253213	127257630	-1	q24.21		lncRNA
ENSG00000246228	cancer susceptibility 8 [Source:HGNC Symbol;Acc:HGNC:45129]	8	127289808	127482139	-1	q24.21	CASC8	lncRNA
ENSG00000280997	colon cancer associated transcript 2 [Source:HGNC Symbol;Acc:HGNC:47044]	8	127400399	127402150	1	q24.21	CCAT2	lncRNA
ENSG00000286266	novel transcript	8	127578473	127636867	1	q24.21		lncRNA
ENSG00000286010	novel transcript	8	127663280	127670990	-1	q24.21		lncRNA
ENSG00000249375	cancer susceptibility 11 [Source:HGNC Symbol;Acc:HGNC:48939]	8	127686343	127738987	-1	q24.21	CASC11	lncRNA
ENSG00000249859	Pvt1 oncogene [Source:HGNC Symbol;Acc:HGNC:9709]	8	127794526	128187101	1	q24.21	PVT1	lncRNA
ENSG00000280055	long intergenic non-protein coding RNA 2912 [Source:HGNC Symbol;Acc:HGNC:32295]	8	127946559	127948723	-1	q24.21	LINC02912	lncRNA
ENSG00000286034	novel transcript	8	128323131	128388636	1	q24.21		lncRNA
ENSG00000254275	long intergenic non-protein coding RNA 824 [Source:HGNC Symbol;Acc:HGNC:50281]	8	128405269	128564679	-1	q24.21	LINC00824	lncRNA
ENSG00000229140	CCDC26 long non-coding RNA [Source:HGNC Symbol;Acc:HGNC:28416]	8	128634199	129683770	-1	q24.21	CCDC26	lncRNA
ENSG00000287785	novel transcript	8	129241228	129242469	1	q24.21		lncRNA
ENSG00000253926	novel transcript	8	129415949	129445852	1	q24.21		lncRNA
ENSG00000285108	novel transcript	8	129685401	129723023	-1	q24.21		lncRNA
ENSG00000254317	novel transcript	8	129832301	129844504	1	q24.21		lncRNA
ENSG00000254263	novel transcript	8	129890465	129901758	1	q24.21		lncRNA
ENSG00000253720	novel transcript	8	129939844	129951056	1	q24.21		lncRNA
ENSG00000287195	novel transcript, antisense to FAM49B	8	129953729	129964634	1	q24.21		lncRNA
ENSG00000280543	ASAP1 intronic transcript 2 [Source:HGNC Symbol;Acc:HGNC:48917]	8	130082738	130084768	-1	q24.21	ASAP1-IT2	lncRNA
ENSG00000287201	novel transcript, antisense to ASAP1	8	130248287	130251051	1	q24.21		lncRNA
ENSG00000286535	novel transcript, antisense to ASAP1	8	130358787	130362461	1	q24.21		lncRNA
ENSG00000253656	novel transcript	8	130595299	130655712	-1	q24.22		lncRNA
ENSG00000253259	novel transcript	8	130892070	130892785	-1	q24.22		lncRNA
ENSG00000253992	novel transcript	8	130935409	130949665	1	q24.22		lncRNA
ENSG00000253407	novel transcript	8	131129761	131144948	-1	q24.22		lncRNA
ENSG00000253507	novel transcript	8	131308545	131317887	1	q24.22		lncRNA
ENSG00000253521	Helicobacter pylori responsive 1 [Source:HGNC Symbol;Acc:HGNC:16071]	8	132507962	132565246	-1	q24.22	HPYR1	lncRNA
ENSG00000287095	novel transcript, antisense to TMEM71	8	132702812	132722283	1	q24.22		lncRNA
ENSG00000270137	novel transcript, intronic to PHF20L1	8	132826179	132826903	1	q24.22		lncRNA
ENSG00000223697	novel transcript, antisense to PHF20L1	8	132838117	132844298	-1	q24.22		lncRNA
ENSG00000287736	papillary thyroid carcinoma susceptibility candidate 1 [Source:NCBI gene (formerly Entrezgene);Acc:100302522]	8	133054959	133057767	1	q24.22	PTCSC1	lncRNA
ENSG00000289316	novel transcript	8	133237171	133237927	-1	q24.22		lncRNA
ENSG00000289050	novel transcript, sense intronic to ST3GAL1	8	133570876	133571619	-1	q24.22		lncRNA
ENSG00000261220	ST3GAL1 divergent transcript [Source:HGNC Symbol;Acc:HGNC:55372]	8	133573183	133573861	1	q24.22	ST3GAL1-DT	lncRNA
ENSG00000253561	novel transcript	8	133771409	133814537	1	q24.22		lncRNA
ENSG00000253165	novel transcript	8	133775551	133777352	-1	q24.22		lncRNA
ENSG00000253593	novel transcript	8	133886496	133902407	1	q24.22		lncRNA
ENSG00000288067	novel transcript	8	134190383	134390487	-1	q24.22		lncRNA
ENSG00000253627	novel transcript	8	134211865	134320447	-1	q24.22		lncRNA
ENSG00000248492	ZFAT antisense RNA 1 [Source:HGNC Symbol;Acc:HGNC:33992]	8	134598071	134600689	1	q24.22	ZFAT-AS1	lncRNA
ENSG00000289405	novel transcript	8	134715820	134799296	-1	q24.22		lncRNA
ENSG00000272456	novel transcript	8	134722947	134723949	1	q24.22		lncRNA
ENSG00000259820	novel transcript	8	134792020	134798272	-1	q24.22		lncRNA
ENSG00000254028	novel transcript	8	134832747	134834482	1	q24.22		lncRNA
ENSG00000253433	novel transcript	8	134838069	134842637	1	q24.22		lncRNA
ENSG00000251218	novel transcript	8	134849935	134881899	1	q24.22		lncRNA
ENSG00000254083	long intergenic non-protein coding RNA 1591 [Source:HGNC Symbol;Acc:HGNC:27819]	8	135234131	135299719	1	q24.22	LINC01591	lncRNA
ENSG00000254372	novel transcript	8	135455865	135456952	-1	q24.23		lncRNA
ENSG00000254101	long intergenic non-protein coding RNA 2055 [Source:HGNC Symbol;Acc:HGNC:52895]	8	135859369	137092183	1	q24.23	LINC02055	lncRNA
ENSG00000286927	novel transcript	8	135977329	135980588	-1	q24.23		lncRNA
ENSG00000285683	Novel transcript	8	136237236	136295232	-1	q24.23		lncRNA
ENSG00000285817	Novel transcript	8	137524755	137645564	-1	q24.23		lncRNA
ENSG00000253288	novel transcript	8	137809444	138083657	-1	q24.23		lncRNA
ENSG00000254361	novel transcript	8	137852204	138019873	1	q24.23		lncRNA
ENSG00000253988	novel transcript	8	138063268	138073240	1	q24.23		lncRNA
ENSG00000253432	novel transcript	8	139096305	139102830	-1	q24.3		lncRNA
ENSG00000253783	novel transcript	8	139114193	139127953	-1	q24.3		lncRNA
ENSG00000254258	novel transcript	8	139460062	139463016	-1	q24.3		lncRNA
ENSG00000253574	novel transcript	8	139911238	139916620	1	q24.3		lncRNA
ENSG00000282164	paternally expressed 13 [Source:HGNC Symbol;Acc:HGNC:19969]	8	140094894	140100543	-1	q24.3	PEG13	lncRNA
ENSG00000259891	novel transcript, antisense to CHRAC1	8	140505813	140508043	-1	q24.3		lncRNA
ENSG00000280303	E2F1-regulated inhibitor of cell death [Source:HGNC Symbol;Acc:HGNC:49404]	8	140636281	140638283	1	q24.3	ERICD	lncRNA
ENSG00000253266	novel transcript	8	141055290	141060596	1	q24.3		lncRNA
ENSG00000253210	DENND3 antisense RNA 1 [Source:HGNC Symbol;Acc:HGNC:55537]	8	141124717	141130070	-1	q24.3	DENND3-AS1	lncRNA
ENSG00000253307	novel transcript	8	141252286	141253292	-1	q24.3		lncRNA
ENSG00000254019	novel transcript, antisense to SLC45A4	8	141254565	141256817	1	q24.3		lncRNA
ENSG00000254197	novel transcript	8	141278228	141292862	1	q24.3		lncRNA
ENSG00000254291	novel transcript	8	141326130	141327137	1	q24.3		lncRNA
ENSG00000253595	long intergenic non-protein coding RNA 1300 [Source:HGNC Symbol;Acc:HGNC:50460]	8	141340505	141344621	1	q24.3	LINC01300	lncRNA
ENSG00000261655	novel transcript, overlapping to GPR20	8	141353403	141355365	-1	q24.3		lncRNA
ENSG00000289263	novel transcript	8	141374203	141382229	1	q24.3		lncRNA
ENSG00000244998	novel transcript, antisense to PTP4A3	8	141389939	141392574	-1	q24.3		lncRNA
ENSG00000271959	novel transcript, antisense to MROH5	8	141434545	141437954	1	q24.3		lncRNA
ENSG00000287325	novel transcript	8	141507333	141509785	1	q24.3		lncRNA
ENSG00000287677	novel transcript	8	141581658	141662209	1	q24.3		lncRNA
ENSG00000261710	novel transcript	8	142089827	142091619	1	q24.3		lncRNA
ENSG00000287332	novel transcript	8	142111414	142185527	-1	q24.3		lncRNA
ENSG00000289338	novel transcript	8	142189982	142194778	1	q24.3		lncRNA
ENSG00000254008	long intergenic non-protein coding RNA 51 [Source:HGNC Symbol;Acc:HGNC:32028]	8	142198356	142209003	1	q24.3	LINC00051	lncRNA
ENSG00000261693	novel transcript, antisense to TSNARE1	8	142403652	142407028	1	q24.3		lncRNA
ENSG00000289477	novel transcript	8	142579023	142580927	1	q24.3		lncRNA
ENSG00000289411	novel transcript	8	142615644	142616205	1	q24.3		lncRNA
ENSG00000277332	novel transcript	8	142616293	142640648	1	q24.3		lncRNA
ENSG00000261044	novel transcript, antisense to ARC	8	142620373	142621064	1	q24.3		lncRNA
ENSG00000253741	lncRNA associated with ovarian cancer 1 [Source:HGNC Symbol;Acc:HGNC:53947]	8	142701857	142727047	-1	q24.3	LNCOC1	lncRNA
ENSG00000253806	novel transcript	8	142727283	142727690	-1	q24.3		lncRNA
ENSG00000253196	novel transcript	8	142763040	142766430	1	q24.3		lncRNA
ENSG00000253715	novel transcript	8	142785374	142812120	1	q24.3		lncRNA
ENSG00000253728	novel transcript	8	142834138	142834940	-1	q24.3		lncRNA
ENSG00000247317	LY6E divergent transcript [Source:HGNC Symbol;Acc:HGNC:53728]	8	142981738	143018437	-1	q24.3	LY6E-DT	lncRNA
ENSG00000177335	long intergenic non-protein coding RNA 2904 [Source:HGNC Symbol;Acc:HGNC:26731]	8	143039209	143060684	1	q24.3	LINC02904	lncRNA
ENSG00000253716	MYC-induced long non-coding RNA [Source:HGNC Symbol;Acc:HGNC:51653]	8	143280158	143281692	-1	q24.3	MINCR	lncRNA
ENSG00000272172	novel transcript, antisense to ZNF696	8	143290399	143290621	-1	q24.3		lncRNA
ENSG00000254389	RHPN1 antisense RNA 1 (head to head) [Source:HGNC Symbol;Acc:HGNC:28457]	8	143366631	143368548	-1	q24.3	RHPN1-AS1	lncRNA
ENSG00000253931	novel transcript	8	143412749	143417054	1	q24.3		lncRNA
ENSG00000254338	MAFA antisense RNA 1 [Source:HGNC Symbol;Acc:HGNC:51203]	8	143417679	143419150	1	q24.3	MAFA-AS1	lncRNA
ENSG00000287576	novel transcript	8	143541648	143545128	1	q24.3		lncRNA
ENSG00000254859	novel transcript	8	143541973	143549729	-1	q24.3		lncRNA
ENSG00000289161	novel transcript, antisense to GSDMD	8	143556821	143558277	-1	q24.3		lncRNA
ENSG00000255050	novel transcript	8	143573490	143577397	1	q24.3		lncRNA
ENSG00000254741	novel transcript	8	143579636	143580670	1	q24.3		lncRNA
ENSG00000254812	novel transcript	8	143620586	143633756	-1	q24.3		lncRNA
ENSG00000181097	long intergenic non-protein coding RNA 2878 [Source:HGNC Symbol;Acc:HGNC:54524]	8	143696154	143698413	1	q24.3	LINC02878	lncRNA
ENSG00000254574	novel transcript	8	143709007	143713584	-1	q24.3		lncRNA
ENSG00000254548	novel transcript	8	143718246	143718891	-1	q24.3		lncRNA
ENSG00000254973	novel transcript	8	143758153	143771870	-1	q24.3		lncRNA
ENSG00000287222	novel transcript, antisense to PUF60	8	143829518	143832861	1	q24.3		lncRNA
ENSG00000255343	novel transcript, sense overlapping NRBP2 3' UTR	8	143833270	143834063	-1	q24.3		lncRNA
ENSG00000285599	Novel transcript, antisense to NRBP2	8	143838779	143840256	1	q24.3		lncRNA
ENSG00000288096	novel transcript	8	143888500	143901588	1	q24.3		lncRNA
ENSG00000255224	TEC	8	144078002	144079265	-1	q24.3		lncRNA
ENSG00000254690	novel transcript	8	144314590	144315138	-1	q24.3		lncRNA
ENSG00000272115	novel transcript, antisense to SLC39A4	8	144409492	144409976	1	q24.3		lncRNA
ENSG00000232600	TONSL antisense RNA 1 [Source:HGNC Symbol;Acc:HGNC:51556]	8	144437675	144439971	1	q24.3	TONSL-AS1	lncRNA
ENSG00000254578	novel transcript, antisense to CYHR1	8	144463817	144465101	1	q24.3		lncRNA
ENSG00000255182	novel transcript, antisense to PPP1R16A	8	144495458	144505444	-1	q24.3		lncRNA
ENSG00000265393	novel transcript, antisense to RECQL4	8	144512567	144513672	1	q24.3		lncRNA
ENSG00000255456	novel transcript, antisense to ARHGAP39	8	144584040	144586488	1	q24.3		lncRNA
ENSG00000254533	novel transcript	8	144698614	144699185	-1	q24.3		lncRNA
ENSG00000263612	novel transcript	8	144713899	144714845	1	q24.3		lncRNA
ENSG00000286681	novel transcript	8	144854875	144869489	-1	q24.3		lncRNA
ENSG00000255164	novel transcript, antisense to ZNF252	8	144992914	144994837	1	q24.3		lncRNA
ENSG00000255559	ZNF252P antisense RNA 1 [Source:HGNC Symbol;Acc:HGNC:27821]	8	145002811	145006046	1	q24.3	ZNF252P-AS1	lncRNA

## Sheet: miRNA
Table S1.4. Micro RNAs statistics of 8q24. The metrics were obtained with BioMart from Ensemble release 109 and GRCh38.p13.
Gene stable ID	Gene description	Chromosome/scaffold name	Gene start (bp)	Gene end (bp)	Strand	Karyotype band	Gene name	Gene type
ENSG00000283956	microRNA 3610 [Source:HGNC Symbol;Acc:HGNC:38942]	8	116874728	116874800	-1	q24.11	MIR3610	miRNA
ENSG00000276479	microRNA 548az [Source:HGNC Symbol;Acc:HGNC:49981]	8	119325171	119325265	1	q24.12	MIR548AZ	miRNA
ENSG00000266324	microRNA 4663 [Source:HGNC Symbol;Acc:HGNC:41623]	8	123215788	123215863	-1	q24.13	MIR4663	miRNA
ENSG00000283172	microRNA 548d-1 [Source:HGNC Symbol;Acc:HGNC:32801]	8	123348034	123348130	-1	q24.13	MIR548D1	miRNA
ENSG00000207704	microRNA 548aa-1 [Source:HGNC Symbol;Acc:HGNC:38944]	8	123348034	123348130	1	q24.13	MIR548AA1	miRNA
ENSG00000284087	microRNA 6844 [Source:HGNC Symbol;Acc:HGNC:50135]	8	124508515	124508576	-1	q24.13	MIR6844	miRNA
ENSG00000263735	microRNA 4662b [Source:HGNC Symbol;Acc:HGNC:41607]	8	124821978	124822058	-1	q24.13	MIR4662B	miRNA
ENSG00000283609	microRNA 4662a [Source:HGNC Symbol;Acc:HGNC:41826]	8	124821985	124822051	1	q24.13	MIR4662A	miRNA
ENSG00000283710	microRNA 1204 [Source:HGNC Symbol;Acc:HGNC:37059]	8	127795962	127796028	1	q24.21	MIR1204	miRNA
ENSG00000221771	microRNA 1205 [Source:HGNC Symbol;Acc:HGNC:35271]	8	127960633	127960695	1	q24.21	MIR1205	miRNA
ENSG00000283200	microRNA 1206 [Source:HGNC Symbol;Acc:HGNC:35272]	8	128008898	128008956	1	q24.21	MIR1206	miRNA
ENSG00000221176	microRNA 1207 [Source:HGNC Symbol;Acc:HGNC:35273]	8	128049152	128049238	1	q24.21	MIR1207	miRNA
ENSG00000221261	microRNA 1208 [Source:HGNC Symbol;Acc:HGNC:35274]	8	128150116	128150188	1	q24.21	MIR1208	miRNA
ENSG00000263763	microRNA 3686 [Source:HGNC Symbol;Acc:HGNC:38887]	8	129484057	129484142	-1	q24.21	MIR3686	miRNA
ENSG00000264653	microRNA 5194 [Source:HGNC Symbol;Acc:HGNC:43498]	8	130008334	130008453	-1	q24.21	MIR5194	miRNA
ENSG00000276961	microRNA 7848 [Source:HGNC Symbol;Acc:HGNC:50058]	8	133046481	133046581	-1	q24.22	MIR7848	miRNA
ENSG00000207582	microRNA 30b [Source:HGNC Symbol;Acc:HGNC:31625]	8	134800520	134800607	-1	q24.22	MIR30B	miRNA
ENSG00000199153	microRNA 30d [Source:HGNC Symbol;Acc:HGNC:31628]	8	134804876	134804945	-1	q24.22	MIR30D	miRNA
ENSG00000254324	microRNA 151a [Source:HGNC Symbol;Acc:HGNC:31762]	8	140732564	140732653	-1	q24.3	MIR151A	miRNA
ENSG00000221768	microRNA 1302-7 [Source:HGNC Symbol;Acc:HGNC:35299]	8	141786242	141786313	-1	q24.3	MIR1302-7	miRNA
ENSG00000265247	microRNA 4472-1 [Source:HGNC Symbol;Acc:HGNC:41644]	8	142176339	142176418	1	q24.3	MIR4472-1	miRNA
ENSG00000265660	microRNA 4664 [Source:HGNC Symbol;Acc:HGNC:41777]	8	143733083	143733153	-1	q24.3	MIR4664	miRNA
ENSG00000284224	microRNA 937 [Source:HGNC Symbol;Acc:HGNC:33680]	8	143812957	143813042	-1	q24.3	MIR937	miRNA
ENSG00000284142	microRNA 6845 [Source:HGNC Symbol;Acc:HGNC:49956]	8	143837756	143837816	-1	q24.3	MIR6845	miRNA
ENSG00000207574	microRNA 661 [Source:HGNC Symbol;Acc:HGNC:32917]	8	143945191	143945279	-1	q24.3	MIR661	miRNA
ENSG00000277888	microRNA 6846 [Source:HGNC Symbol;Acc:HGNC:50026]	8	144057321	144057380	-1	q24.3	MIR6846	miRNA
ENSG00000284200	microRNA 6847 [Source:HGNC Symbol;Acc:HGNC:50022]	8	144079874	144079942	1	q24.3	MIR6847	miRNA
ENSG00000284054	microRNA 7112 [Source:HGNC Symbol;Acc:HGNC:50149]	8	144262673	144262737	-1	q24.3	MIR7112	miRNA
ENSG00000284229	microRNA 6848 [Source:HGNC Symbol;Acc:HGNC:50176]	8	144317246	144317315	-1	q24.3	MIR6848	miRNA
ENSG00000284310	microRNA 939 [Source:HGNC Symbol;Acc:HGNC:33682]	8	144394149	144394230	-1	q24.3	MIR939	miRNA
ENSG00000284139	microRNA 1234 [Source:HGNC Symbol;Acc:HGNC:33926]	8	144400086	144400165	-1	q24.3	MIR1234	miRNA
ENSG00000283770	microRNA 6849 [Source:HGNC Symbol;Acc:HGNC:49991]	8	144400277	144400345	-1	q24.3	MIR6849	miRNA
ENSG00000276598	microRNA 6893 [Source:HGNC Symbol;Acc:HGNC:50130]	8	144435551	144435619	-1	q24.3	MIR6893	miRNA
ENSG00000283764	microRNA 6850 [Source:HGNC Symbol;Acc:HGNC:50093]	8	144791931	144791991	-1	q24.3	MIR6850	miRNA

## Sheet: misc_RNA
Table S1.5. Miscellaneous RNAs statistics of 8q24. The metrics were obtained with BioMart from Ensemble release 109 and GRCh38.p13.
Gene stable ID	Gene description	Chromosome/scaffold name	Gene start (bp)	Gene end (bp)	Strand	Karyotype band	Gene name	Gene type
ENSG00000244033	RNA, 7SL, cytoplasmic 228, pseudogene [Source:HGNC Symbol;Acc:HGNC:46244]	8	117017946	117018248	1	q24.11	RN7SL228P	misc_RNA
ENSG00000240151	RNA, 7SL, cytoplasmic 826, pseudogene [Source:HGNC Symbol;Acc:HGNC:46842]	8	117163968	117164255	1	q24.11	RN7SL826P	misc_RNA
ENSG00000201896	RN7SK pseudogene 153 [Source:HGNC Symbol;Acc:HGNC:45877]	8	119711830	119712145	-1	q24.12	RN7SKP153	misc_RNA
ENSG00000244642	RNA, 7SL, cytoplasmic 396, pseudogene [Source:HGNC Symbol;Acc:HGNC:46412]	8	119862662	119862956	1	q24.12	RN7SL396P	misc_RNA
ENSG00000251840	RN7SK pseudogene 155 [Source:HGNC Symbol;Acc:HGNC:45879]	8	123588759	123589046	1	q24.13	RN7SKP155	misc_RNA
ENSG00000242170	RNA, 7SL, cytoplasmic 329, pseudogene [Source:HGNC Symbol;Acc:HGNC:46345]	8	125270604	125270902	1	q24.13	RN7SL329P	misc_RNA
ENSG00000278324		8	127890626	127890720	1	q24.21		misc_RNA
ENSG00000201782	RN7SK pseudogene 226 [Source:HGNC Symbol;Acc:HGNC:45950]	8	128220504	128220803	1	q24.21	RN7SKP226	misc_RNA
ENSG00000222755	RN7SK pseudogene 206 [Source:HGNC Symbol;Acc:HGNC:45930]	8	129290983	129291275	1	q24.21	RN7SKP206	misc_RNA
ENSG00000276193	Metazoan signal recognition particle RNA [Source:RFAM;Acc:RF00017]	8	133668420	133668701	-1	q24.22	Metazoa_SRP	misc_RNA
ENSG00000276140		8	134598071	134598149	1	q24.22		misc_RNA
ENSG00000277732		8	134598318	134598518	1	q24.22		misc_RNA
ENSG00000278454		8	134600257	134600336	1	q24.22		misc_RNA
ENSG00000253602	RNA, 7SL, cytoplasmic 260, pseudogene [Source:HGNC Symbol;Acc:HGNC:46276]	8	142247585	142247866	-1	q24.3	RN7SL260P	misc_RNA
ENSG00000275558	RN7SK pseudogene 175 [Source:HGNC Symbol;Acc:HGNC:45899]	8	143542110	143542398	1	q24.3	RN7SKP175	misc_RNA
ENSG00000274772	Metazoan signal recognition particle RNA [Source:RFAM;Acc:RF00017]	8	144683169	144683464	1	q24.3	Metazoa_SRP	misc_RNA
ENSG00000244307	RNA, 7SL, cytoplasmic 395, pseudogene [Source:HGNC Symbol;Acc:HGNC:46411]	8	144785298	144785588	1	q24.3	RN7SL395P	misc_RNA

## Sheet: snoRNA
Table S1.6. SnoRNAs statistics of 8q24. The metrics were obtained with BioMart from Ensemble release 109 and GRCh38.p13.
Gene stable ID	Gene description	Chromosome/scaffold name	Gene start (bp)	Gene end (bp)	Strand	Karyotype band	Gene name	Gene type
ENSG00000252852		8	117313528	117313661	1	q24.11		snoRNA
ENSG00000206776		8	119388348	119388469	1	q24.12		snoRNA
ENSG00000238901		8	122671291	122671394	1	q24.13		snoRNA
ENSG00000221461	Small nucleolar RNA U3 [Source:RFAM;Acc:RF00012]	8	123180310	123180525	-1	q24.13	U3	snoRNA
ENSG00000200075		8	129868590	129868716	-1	q24.21		snoRNA
ENSG00000212342		8	130162972	130163127	1	q24.21		snoRNA
ENSG00000252158	Small nucleolar RNA SNORA72 [Source:RFAM;Acc:RF00139]	8	131432776	131432869	-1	q24.22	SNORA72	snoRNA
ENSG00000212273		8	133644598	133644725	-1	q24.22		snoRNA
ENSG00000251744		8	139108430	139108534	1	q24.3		snoRNA
ENSG00000238854		8	141447475	141447549	1	q24.3		snoRNA

## Sheet: snRNA
Table S1.7. SnRNAs statistics of 8q24. The metrics were obtained with BioMart from Ensemble release 109 and GRCh38.p13.
Gene stable ID	Gene description	Chromosome/scaffold name	Gene start (bp)	Gene end (bp)	Strand	Karyotype band	Gene name	Gene type
ENSG00000207334	RNA, U6 small nuclear 12, pseudogene [Source:HGNC Symbol;Acc:HGNC:34256]	8	118976513	118976619	1	q24.12	RNU6-12P	snRNA
ENSG00000222607	RNA, U6 small nuclear 628, pseudogene [Source:HGNC Symbol;Acc:HGNC:47591]	8	123262843	123262949	1	q24.13	RNU6-628P	snRNA
ENSG00000252297	RNA, U6 small nuclear 875, pseudogene [Source:HGNC Symbol;Acc:HGNC:47838]	8	123342414	123342519	1	q24.13	RNU6-875P	snRNA
ENSG00000278374	U4 spliceosomal RNA [Source:RFAM;Acc:RF00015]	8	123454981	123455107	-1	q24.13	U4	snRNA
ENSG00000206724	RNA, U6 small nuclear 756, pseudogene [Source:HGNC Symbol;Acc:HGNC:47719]	8	124260646	124260752	1	q24.13	RNU6-756P	snRNA
ENSG00000206695	RNA, U6 small nuclear 442, pseudogene [Source:HGNC Symbol;Acc:HGNC:47405]	8	125900951	125901054	1	q24.13	RNU6-442P	snRNA
ENSG00000207138	RNA, U6 small nuclear 869, pseudogene [Source:HGNC Symbol;Acc:HGNC:47832]	8	126504763	126504869	1	q24.21	RNU6-869P	snRNA
ENSG00000212451	RNA, U11 small nuclear 4, pseudogene [Source:HGNC Symbol;Acc:HGNC:46944]	8	126671522	126671654	1	q24.21	RNU11-4P	snRNA
ENSG00000207110	RNA, variant U1 small nuclear 32 [Source:HGNC Symbol;Acc:HGNC:48448]	8	127999131	127999294	1	q24.21	RNVU1-32	snRNA
ENSG00000222501	RNA, U4 small nuclear 25, pseudogene [Source:HGNC Symbol;Acc:HGNC:46961]	8	128010382	128010611	-1	q24.21	RNU4-25P	snRNA
ENSG00000253043	RNA, U7 small nuclear 181 pseudogene [Source:HGNC Symbol;Acc:HGNC:45715]	8	130004528	130004601	-1	q24.21	RNU7-181P	snRNA
ENSG00000200304	RNA, U6 small nuclear 1255, pseudogene [Source:HGNC Symbol;Acc:HGNC:48218]	8	130069541	130069652	-1	q24.21	RNU6-1255P	snRNA
ENSG00000199652	RNA, U1 small nuclear 35, pseudogene [Source:HGNC Symbol;Acc:HGNC:48377]	8	135742343	135742495	-1	q24.23	RNU1-35P	snRNA
ENSG00000206678	RNA, U6 small nuclear 144, pseudogene [Source:HGNC Symbol;Acc:HGNC:47107]	8	137105352	137105458	1	q24.23	RNU6-144P	snRNA
ENSG00000212221	RNA, U6 small nuclear 220, pseudogene [Source:HGNC Symbol;Acc:HGNC:47183]	8	143350172	143350278	1	q24.3	RNU6-220P	snRNA

## Sheet: TEC
Table S1.8. To be Experimentally Confirmed gene statistics of 8q24. The metrics were obtained with BioMart from Ensemble release 109 and GRCh38.p13.
Gene stable ID	Gene description	Chromosome/scaffold name	Gene start (bp)	Gene end (bp)	Strand	Karyotype band	Gene name	Gene type
ENSG00000279347	TEC	8	119838736	119840385	-1	q24.12		TEC
ENSG00000278898	TEC	8	134764809	134767276	1	q24.22		TEC
ENSG00000279518	TEC	8	134783694	134785879	-1	q24.22		TEC
ENSG00000250733	chromosome 8 putative open reading frame 17 [Source:HGNC Symbol;Acc:HGNC:17737]	8	139931172	139933942	1	q24.3	C8orf17	TEC
ENSG00000279766	TEC	8	140572142	140572812	-1	q24.3		TEC
ENSG00000280326	TEC	8	140591684	140593201	1	q24.3		TEC
ENSG00000279786	TEC	8	140820599	140822414	-1	q24.3		TEC
ENSG00000280035	TEC	8	141224288	141226947	-1	q24.3		TEC
ENSG00000279605	TEC	8	143578358	143583304	1	q24.3		TEC

## Sheet: processed_pseudogene
Table S1.9. Processed pseudogene statistics of 8q24. The metrics were obtained with BioMart from Ensemble release 109 and GRCh38.p13.
Gene stable ID	Gene description	Chromosome/scaffold name	Gene start (bp)	Gene end (bp)	Strand	Karyotype band	Gene name	Gene type
ENSG00000253271	Nuclear receptor coactivator 3 (NCoA-3) pseudogene	8	117055818	117056145	1	q24.11		processed_pseudogene
ENSG00000242206	ribosomal protein S26 pseudogene 35 [Source:HGNC Symbol;Acc:HGNC:36229]	8	118761856	118762201	-1	q24.12	RPS26P35	processed_pseudogene
ENSG00000254247	GABA(A) receptor-associated protein-like 2 (GABARAPL2) pseudogene	8	118982579	118982875	-1	q24.12		processed_pseudogene
ENSG00000254037	zinc finger protein 532 (ZNF532) pseudogene	8	119480279	119480775	-1	q24.12		processed_pseudogene
ENSG00000253495	CYCS pseudogene 23 [Source:HGNC Symbol;Acc:HGNC:24397]	8	119618162	119618474	-1	q24.12	CYCSP23	processed_pseudogene
ENSG00000250290	non-SMC condensin I complex subunit G pseudogene 1 [Source:HGNC Symbol;Acc:HGNC:51904]	8	120635558	120638204	-1	q24.12	NCAPGP1	processed_pseudogene
ENSG00000271219	glucosamine-phosphate N-acetyltransferase 1 (GNPNAT1) pseudogene	8	121113358	121113919	-1	q24.12		processed_pseudogene
ENSG00000239872	ribosomal protein L35a pseudogene 19 [Source:HGNC Symbol;Acc:HGNC:36631]	8	121380137	121380465	-1	q24.12	RPL35AP19	processed_pseudogene
ENSG00000253814	mitochondrial ribosomal protein S36 pseudogene 3 [Source:HGNC Symbol;Acc:HGNC:29773]	8	122091480	122091609	1	q24.13	MRPS36P3	processed_pseudogene
ENSG00000235165	cyclin dependent kinase 5 pseudogene 1 [Source:HGNC Symbol;Acc:HGNC:21261]	8	122769274	122770150	1	q24.13	CDK5P1	processed_pseudogene
ENSG00000253463	high mobility group box 1 pseudogene 19 [Source:HGNC Symbol;Acc:HGNC:39101]	8	123123106	123123682	1	q24.13	HMGB1P19	processed_pseudogene
ENSG00000243498	ubiquitin A-52 residue ribosomal protein fusion product 1 pseudogene 5 [Source:HGNC Symbol;Acc:HGNC:36993]	8	123236852	123237062	1	q24.13	UBA52P5	processed_pseudogene
ENSG00000253336	hydroxysteroid (17-beta) dehydrogenase 4 (HSD17B4) pseudogene	8	123288355	123290503	1	q24.13		processed_pseudogene
ENSG00000254388	deoxyuridine triphosphatase pseudogene 2 [Source:HGNC Symbol;Acc:HGNC:39515]	8	123352181	123352643	1	q24.13	DUTP2	processed_pseudogene
ENSG00000254294	inosine monophosphate dehydrogenase 1 pseudogene 6 [Source:HGNC Symbol;Acc:HGNC:33961]	8	123400582	123402095	1	q24.13	IMPDH1P6	processed_pseudogene
ENSG00000250727	neuropilin (NRP) and tolloid (TLL)-like 2 (NETO2) pseudogene	8	124141888	124143512	1	q24.13		processed_pseudogene
ENSG00000253885	ADP ribosylation factor 1 pseudogene 3 [Source:HGNC Symbol;Acc:HGNC:39884]	8	124151923	124152433	1	q24.13	ARF1P3	processed_pseudogene
ENSG00000237586	SRY (sex determining region Y)-box 2 (SOX2) pseudogene	8	124301315	124301804	1	q24.13		processed_pseudogene
ENSG00000250428	MRS2 pseudogene 1 [Source:HGNC Symbol;Acc:HGNC:20590]	8	124920428	124922076	1	q24.13	MRS2P1	processed_pseudogene
ENSG00000253651	superoxide dismutase 1 pseudogene 3 [Source:HGNC Symbol;Acc:HGNC:45136]	8	125951861	125952314	-1	q24.13	SOD1P3	processed_pseudogene
ENSG00000250563	lysine rich nucleolar protein 1 pseudogene 5 [Source:HGNC Symbol;Acc:HGNC:48923]	8	126072587	126074231	1	q24.13	KNOP1P5	processed_pseudogene
ENSG00000253841	Transmembrane protein C12orf67 pseudogene	8	126073046	126073532	-1	q24.13		processed_pseudogene
ENSG00000248720	ret finger protein like 4A pseudogene 5 [Source:HGNC Symbol;Acc:HGNC:45144]	8	126174186	126175014	-1	q24.13	RFPL4AP5	processed_pseudogene
ENSG00000253543	zinc finger protein pseudogene	8	126582631	126583006	-1	q24.21		processed_pseudogene
ENSG00000224722	serine/arginine repetitive matrix 1 (SRRM1) pseudogene	8	127086263	127087510	-1	q24.21		processed_pseudogene
ENSG00000271509	small nuclear ribonucleoprotein polypeptide G (SNRPG) pseudogene	8	127292233	127292440	1	q24.21		processed_pseudogene
ENSG00000253225	minichromosome maintenance complex component 3 associated protein (MCM3AP) pseudogene	8	129250967	129251138	1	q24.21		processed_pseudogene
ENSG00000224110	mitochondrial translational release factor 1 like pseudogene 2 [Source:HGNC Symbol;Acc:HGNC:50612]	8	129728744	129730445	1	q24.21	MTRF1LP2	processed_pseudogene
ENSG00000243402	ribosomal protein L15 (RPL15) pseudogene	8	129864478	129865052	1	q24.21		processed_pseudogene
ENSG00000254255	RNA binding motif protein 45 (RBM45) pseudogene	8	131712512	131712980	1	q24.22		processed_pseudogene
ENSG00000240237	ribosomal protein L21 (RPL21) pseudogene	8	133002605	133003075	-1	q24.22		processed_pseudogene
ENSG00000243537	ribosomal protein L32 pseudogene 20 [Source:HGNC Symbol;Acc:HGNC:35934]	8	133325997	133326404	1	q24.22	RPL32P20	processed_pseudogene
ENSG00000253638	developmental pluripotency associated 3 pseudogene	8	133392211	133392690	-1	q24.22		processed_pseudogene
ENSG00000225259	ST13, Hsp70 interacting protein pseudogene 6 [Source:HGNC Symbol;Acc:HGNC:18557]	8	133408006	133409107	1	q24.22	ST13P6	processed_pseudogene
ENSG00000283176	mitochondrially encoded NADH dehydrogenase 3 (MT-ND3) pseudogene	8	133515506	133515745	1	q24.22		processed_pseudogene
ENSG00000283197	mitochondrially encoded NADH 4L dehydrogenase (MT-ND4L) pseudogene	8	133516184	133516268	1	q24.22		processed_pseudogene
ENSG00000253970	MT-ND2 pseudogene 7 [Source:HGNC Symbol;Acc:HGNC:42141]	8	133754811	133755450	1	q24.22	MTND2P7	processed_pseudogene
ENSG00000253916	MT-CO1 pseudogene 49 [Source:HGNC Symbol;Acc:HGNC:52114]	8	133755845	133756646	1	q24.22	MTCO1P49	processed_pseudogene
ENSG00000254313	non-metastatic cells 2, protein (NM23B) expressed in pseudogene	8	133786093	133786268	-1	q24.22		processed_pseudogene
ENSG00000271240	NIMA-related kinase 4 (NEK4) pseudogene	8	133962992	133963259	-1	q24.22		processed_pseudogene
ENSG00000271048	developmental pluripotency associated 3 (DPPA3) pseudogene	8	134673131	134673512	1	q24.22		processed_pseudogene
ENSG00000244413	ribosomal protein L23a pseudogene 56 [Source:HGNC Symbol;Acc:HGNC:35516]	8	134978827	134979279	-1	q24.22	RPL23AP56	processed_pseudogene
ENSG00000253915	MAPRE1 pseudogene 1 [Source:HGNC Symbol;Acc:HGNC:29624]	8	135625185	135625981	-1	q24.23	MAPRE1P1	processed_pseudogene
ENSG00000254076	nucleolar and coiled-body phosphoprotein 1 (NOLC1) pseudogene	8	137696724	137698467	1	q24.23		processed_pseudogene
ENSG00000274064	glyceraldehyde-3-phosphate dehydrogenase (GAPDH) pseudogene	8	140039756	140041037	1	q24.3		processed_pseudogene
ENSG00000253605	heterogeneous nuclear ribonucleoprotein A1pseudogene 38 [Source:HGNC Symbol;Acc:HGNC:48767]	8	141459075	141460031	1	q24.3	HNRNPA1P38	processed_pseudogene
ENSG00000254183	DnaJ (Hsp40) homolog, subfamily C, member 8 (DNAJC8) pseudogene	8	141968091	141968841	-1	q24.3		processed_pseudogene
ENSG00000253421	zinc finger HIT-type containing 1 pseudogene 1 [Source:HGNC Symbol;Acc:HGNC:44474]	8	142858354	142858797	1	q24.3	ZNHIT1P1	processed_pseudogene
ENSG00000253971	cell division cycle 42 pseudogene 3 [Source:HGNC Symbol;Acc:HGNC:44427]	8	142995850	142996482	1	q24.3	CDC42P3	processed_pseudogene
ENSG00000250115	adenylate kinase 3 pseudogene 2 [Source:HGNC Symbol;Acc:HGNC:31099]	8	143057060	143057816	-1	q24.3	AK3P2	processed_pseudogene
ENSG00000243328	ribosomal protein S26 (RPS26) pseudogene	8	143065915	143066587	-1	q24.3		processed_pseudogene
ENSG00000254618	transmembrane p24 trafficking protein 10 pseudogene 1 [Source:HGNC Symbol;Acc:HGNC:30754]	8	144994886	144995540	1	q24.3	TMED10P1	processed_pseudogene
ENSG00000255530	zinc finger with KRAB and SCAN domains 1 (ZKSCAN1) pseudogene	8	145005561	145005906	-1	q24.3		processed_pseudogene
ENSG00000255000	zinc finger protein pseudogene	8	145047860	145048889	1	q24.3		processed_pseudogene

## Sheet: unprocessed_pseudogene
Table S1.10. Micro RNAs statistics of 8q24. The metrics were obtained with BioMart from Ensemble release 109 and GRCh38.p13.
Gene stable ID	Gene description	Chromosome/scaffold name	Gene start (bp)	Gene end (bp)	Strand	Karyotype band	Gene name	Gene type
ENSG00000239917	ribosomal protein S10 pseudogene 16 [Source:HGNC Symbol;Acc:HGNC:36200]	8	117523271	117524061	-1	q24.11	RPS10P16	unprocessed_pseudogene
ENSG00000277576	CTAGE family, member 5 (CTAGE5) pseudogene	8	133946677	133947335	1	q24.22		unprocessed_pseudogene
ENSG00000274572	zyxin pseudogene 1 [Source:HGNC Symbol;Acc:HGNC:51695]	8	137424904	137425021	-1	q24.23	ZYXP1	unprocessed_pseudogene
ENSG00000275078	MAD1 mitotic arrest deficient-like 1 (yeast) (MAD1L1) pseudogene	8	139508701	139508971	-1	q24.3		unprocessed_pseudogene
ENSG00000283686	lymphocyte antigen 6 complex, locus K (LY6K) pseudogene	8	142797624	142806142	-1	q24.3		unprocessed_pseudogene

[truncated: 6 more sheets: rRNA_pseudogene, Transcribe processed pseudogene, Polymorphic pseudogene, transcribe unitary pseudogene, transcribe unprocessed pseudoge, Unitary pseudogene]
